# Supplementary material
Source: PubMed Central journal article supplement (PMC3738824)
Supplement: mmc1.pdf [file mmc1.pdf]

The American Journal of Human Genetics, Volume 93

## Supplemental Data

### Detection of Clinically Relevant Genetic Variants

#### in Autism Spectrum Disorder

#### by Whole-Genome Sequencing

Yong-hui Jiang,<sup>1,18</sup> Ryan K.C. Yuen,<sup>2,18</sup> Xin Jin,<sup>3,4,5\*</sup> Mingbang Wang,<sup>3,18</sup> Nong Chen,<sup>3</sup> Xueli Wu,<sup>3</sup> Jia Ju,<sup>3</sup> Junpu Mei,<sup>3</sup> Yujian Shi,<sup>3</sup> Mingze He,<sup>3</sup> Guangbiao Wang,<sup>3</sup> Jieqin Liang,<sup>3</sup> Zhe Wang,<sup>3</sup> Dandan Cao,<sup>3</sup> Melissa T. Carter,<sup>6</sup> Christina Chrysler,<sup>7</sup> Irene E. Drmic,<sup>7</sup> Jennifer L. Howe,<sup>2</sup> Lynette Lau,<sup>2</sup> Christian R. Marshall,<sup>2,8</sup> Daniele Merico,<sup>2</sup> Thomas Nalpathamkalam,<sup>2</sup> Bhooma Thiruvahindrapuram,<sup>2</sup> Ann Thompson,<sup>7</sup> Mohammed Uddin,<sup>2</sup> Susan Walker,<sup>2</sup> Jun Luo,<sup>9</sup> Evdokia Anagnostou,<sup>10</sup> Lonnie Zwaigenbaum,<sup>11</sup> Robert H. Ring,<sup>12</sup> Jian Wang,<sup>3</sup> Clara Lajonchere,<sup>12</sup> Jun Wang,<sup>3,13,14,15,16</sup> Andy Shih,<sup>12</sup> Peter Szatmari,<sup>7</sup> Huanming Yang,<sup>3</sup> Geraldine Dawson,<sup>12,17</sup> Yingrui Li,<sup>3,\*</sup> and Stephen W. Scherer<sup>2,8,\*\*</sup>

**Figure S1**

|                         |                              |                 |
|-------------------------|------------------------------|-----------------|
| # of samples            | Illumina1M - 1; Affy6.0 - 31 | Agilent 1M - 26 |
| Mean / Median Size (kb) | 67 / 19.8                    | 102 / 29        |
| % Gain / Loss           | 27 / 71                      | 42 / 58         |

  

|                                                                  | total | average/meadian per genome | total | average/meadian per genome |
|------------------------------------------------------------------|-------|----------------------------|-------|----------------------------|
| # of stringent CNVs / genome                                     | 2059  | 66 / 66                    | 940   | 36 / 36                    |
| # of stringent genic CNVs / genome                               | 923   | 29 / 29                    | 519   | 20 / 20                    |
| # of stringent exonic CNVs / genome                              | 700   | 22 / 22                    | 415   | 16 / 16                    |
| # of stringent exonic rare CNVs / genome                         | 26    | < 1                        | 9     | < 1                        |
| # of stringent exonic rare CNVs overlapping known ASD genes/loci | 0     | 0                          | 0     | 0                          |

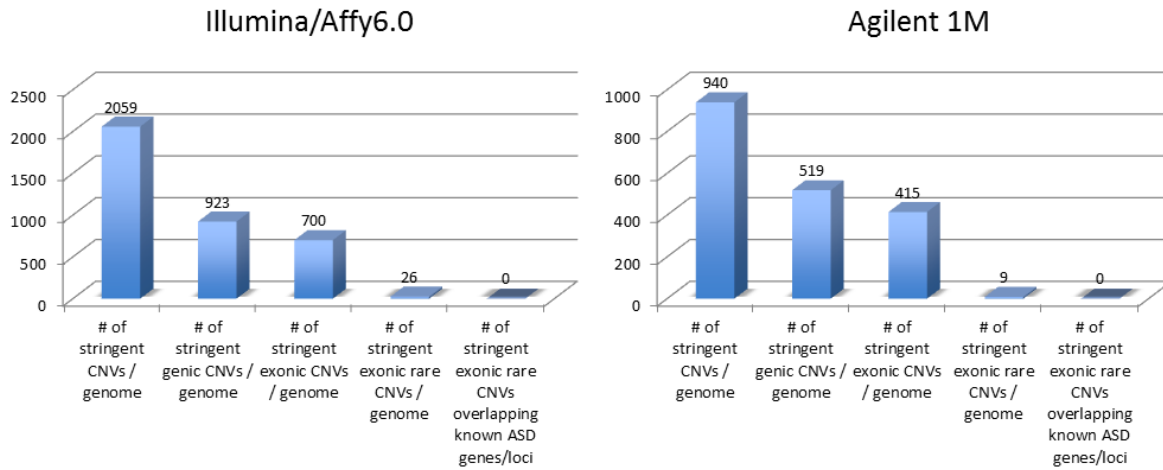

Copy number variation distribution in 32 samples. None of the sample contains exonic rare CNVs overlapping known ASD genes/loci.

Figure S2

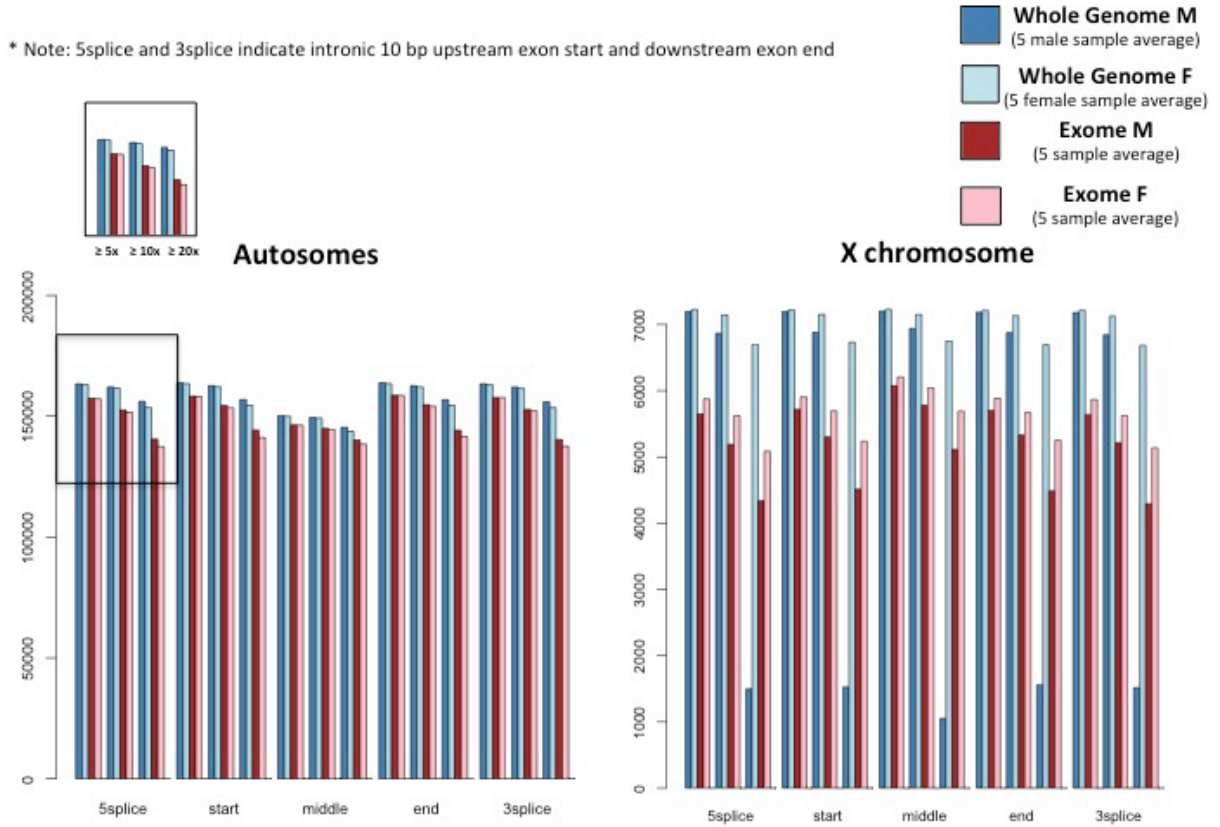

Sequencing coverage in exonic regions with subdivision into different genomic locations.

Figure S3

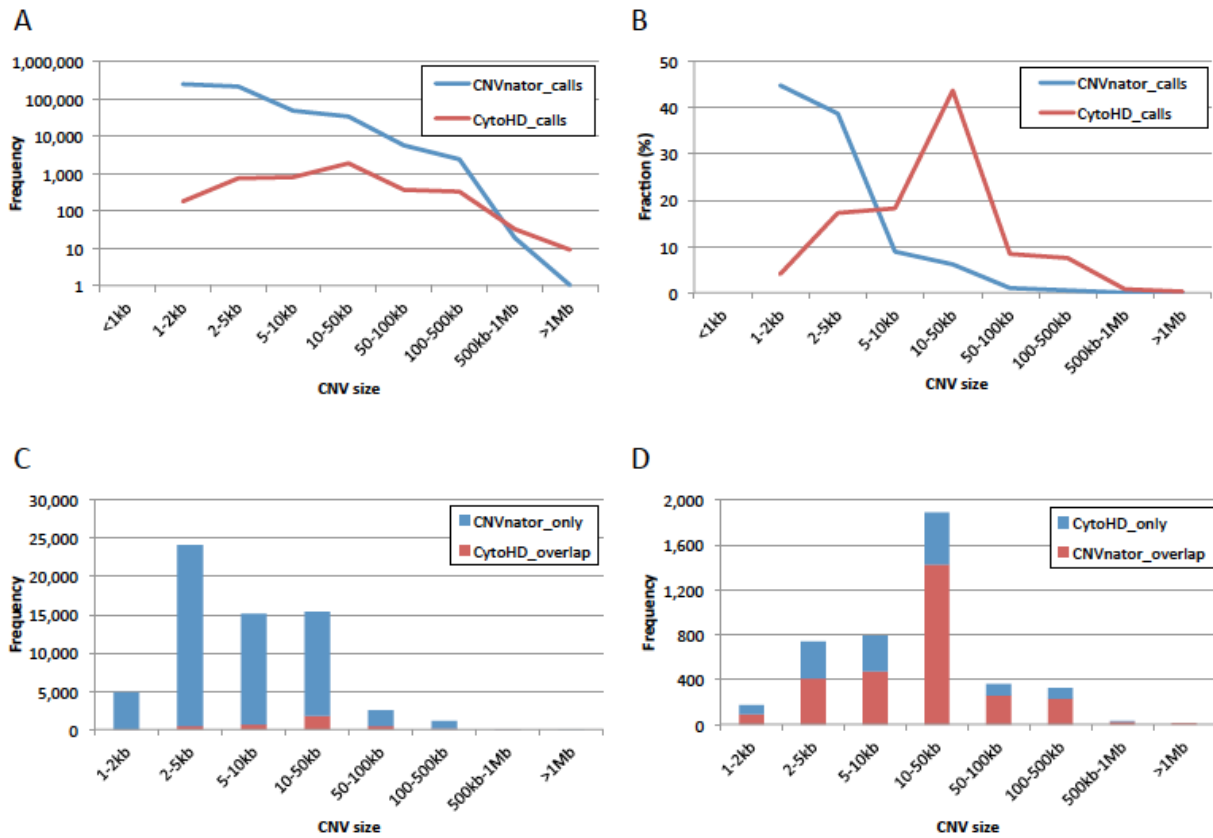

Comparison of CNV calling performance between WGS and microarray. A) Size distribution of CNVs called by CNVnator (WGS) and by CytoScan HD (microarray). Total number of CNVs called by CNVnator is >100 times more than that by CytoHD. B) Size distribution of CNVs called by CNVnator and by CytoScan HD presented in fraction. CNV calling by CytoScan is more sensitive at size range 10-50kb, while calling by CNVnator is more sensitive at size range 1-2kb. C) Number of CNVs called by CytoHD overlap with that by CNVnator in regions where CytoHD has sufficient probe coverage (>5 probes). D) Number of CNVs called by CNVnator overlap with that by CytoHD in regions where stringent calls were made in CytoHD (see Materials and Methods).

**Figure S4**

Statistics for ASD genes not well covered  
( $d < 5x$ : insufficient coverage,  $5x \leq d < 10x$ : low coverage)

| CDS overlap $\geq 25\%$                                   | WGS<br>$d < 5x$ | WES<br>$d < 5x$ | WGS<br>$5x \leq d < 10x$ | WES<br>$5x \leq d < 10x$ | WES<br>Not targeted |
|-----------------------------------------------------------|-----------------|-----------------|--------------------------|--------------------------|---------------------|
| ASD gene N#<br>at least <i>one</i> exon not well covered  | 12              | 11              | 18                       | 21                       | 11                  |
| ASD gene N#<br>at least <i>two</i> exons not well covered | 2               | 2               | 3                        | 4                        | 3                   |
| ASD gene exon N# not well covered                         | 14              | 25              | 21                       | 27                       | 30                  |

  

| CDS overlap = 100%                                        | WGS<br>$d < 5x$ | WES<br>$d < 5x$ | WGS<br>$5x \leq d < 10x$ | WES<br>$5x \leq d < 10x$ | WES<br>Not targeted |
|-----------------------------------------------------------|-----------------|-----------------|--------------------------|--------------------------|---------------------|
| ASD gene N#<br>at least <i>one</i> exon not well covered  | 3               | 7               | 6                        | 15                       | 11                  |
| ASD gene N#<br>at least <i>two</i> exons not well covered | 1               | 2               | 3                        | 4                        | 3                   |
| ASD gene exon N# not well covered                         | 4               | 20              | 9                        | 20                       | 30                  |

- \* Autosomes, X, Y
- \* All subjects (5 WGS-M, 5 WGS-F, 5 WES-M, 5 WES-F)
- \* ASD genes total: 119 (AGP list)
- \* ASD exons total: 2035
- \* ASD exons total, CDS overlap = 100%: 1727

Coverage of WGS and (whole exome sequencing) WES in known ASD gene list. Listed are the numbers of genes that had at least one exon not covered by the platform. We reported the coverage statistics for known ASD genes, based on the number of exons with insufficient ( $d < 5x$ ) or low coverage ( $5x \leq d < 10x$ ), or not on the exome capture target (Figure S3).

**Table S1. Summary of number of variants detected in all samples**

| <b>Sample ID</b> | <b>Sequencing depth</b> | <b>Coverage of genome(%)</b> | <b>Total SNPs</b> | <b>Total INDELS</b> |
|------------------|-------------------------|------------------------------|-------------------|---------------------|
| 2-0704-01        | 39.2                    | 99.8                         | 3,185,306         | 811,254             |
| 2-0704-02        | 36.7                    | 99.8                         | 3,170,877         | 807,224             |
| 2-0704-03        | 35.2                    | 99.8                         | 3,164,829         | 824,025             |
| 2-1116-01        | 36.5                    | 99.8                         | 3,233,019         | 816,870             |
| 2-1116-02        | 39.2                    | 99.9                         | 3,266,462         | 827,034             |
| 2-1116-03        | 42.1                    | 99.9                         | 3,241,117         | 841,398             |
| 2-1182-01        | 36.1                    | 99.9                         | 3,220,029         | 798,601             |
| 2-1182-02        | 39.3                    | 99.9                         | 3,177,106         | 794,421             |
| 2-1182-03        | 39.4                    | 99.9                         | 3,199,160         | 816,021             |
| 2-1186-01        | 34.8                    | 99.8                         | 3,231,424         | 796,610             |
| 2-1186-02        | 46.0                    | 99.9                         | 3,215,304         | 811,282             |
| 2-1186-03        | 44.1                    | 99.8                         | 3,205,158         | 823,067             |
| 2-1239-01        | 36.5                    | 99.8                         | 3,210,421         | 796,820             |
| 2-1239-02        | 38.7                    | 99.8                         | 3,215,488         | 804,988             |
| 2-1239-03        | 38.4                    | 99.8                         | 3,221,124         | 821,915             |
| 2-1244-01        | 42.5                    | 99.8                         | 3,204,198         | 808,489             |
| 2-1244-02        | 38.3                    | 99.8                         | 3,182,264         | 797,538             |
| 2-1244-03        | 43.0                    | 99.8                         | 3,171,956         | 816,921             |
| 2-1266-01        | 37.3                    | 99.8                         | 3,229,060         | 801,066             |
| 2-1266-02        | 35.5                    | 99.8                         | 3,173,747         | 787,001             |
| 2-1266-03        | 39.4                    | 99.8                         | 3,224,993         | 821,124             |
| 2-1268-01        | 41.5                    | 99.8                         | 3,197,338         | 811,544             |
| 2-1268-02        | 43.4                    | 99.8                         | 3,197,033         | 810,883             |
| 2-1268-03        | 40.1                    | 99.8                         | 3,187,370         | 824,590             |
| 2-1269-01        | 39.9                    | 99.8                         | 3,178,207         | 800,913             |
| 2-1269-02        | 42.1                    | 99.8                         | 3,156,867         | 796,563             |
| 2-1269-03        | 39.5                    | 99.8                         | 3,148,740         | 812,439             |
| 2-1272-01        | 43.3                    | 99.8                         | 3,230,825         | 808,617             |
| 2-1272-02        | 39.8                    | 99.8                         | 3,199,100         | 799,398             |
| 2-1272-03        | 36.7                    | 99.8                         | 3,196,376         | 813,334             |
| 2-1276-01        | 35.6                    | 99.8                         | 3,189,611         | 806,420             |
| 2-1276-02        | 41.3                    | 99.8                         | 3,153,014         | 805,522             |
| 2-1276-03        | 38.0                    | 99.8                         | 3,207,424         | 832,309             |
| 2-1280-01        | 40.8                    | 99.9                         | 3,303,969         | 834,195             |
| 2-1280-02        | 41.1                    | 99.8                         | 3,270,404         | 826,792             |
| 2-1280-03        | 39.0                    | 99.8                         | 3,317,472         | 855,153             |
| 2-1291-01        | 26.1                    | 99.8                         | 3,212,103         | 792,590             |
| 2-1291-02        | 39.8                    | 99.8                         | 3,178,590         | 794,986             |
| 2-1291-03        | 44.9                    | 99.8                         | 3,188,245         | 813,041             |

| Sample ID | Sequencing depth | Coverage of genome(%) | Total SNPs | Total INDELS |
|-----------|------------------|-----------------------|------------|--------------|
| 2-1295-01 | 37.8             | 99.8                  | 3,266,952  | 793,867      |
| 2-1295-02 | 38.6             | 99.8                  | 3,209,822  | 788,055      |
| 2-1295-03 | 34.0             | 99.8                  | 3,238,805  | 791,829      |
| 2-1303-01 | 36.8             | 99.8                  | 3,206,628  | 790,300      |
| 2-1303-02 | 37.0             | 99.8                  | 3,187,798  | 781,632      |
| 2-1303-03 | 37.0             | 99.8                  | 3,190,293  | 801,778      |
| 2-1305-01 | 34.7             | 99.8                  | 3,254,739  | 793,140      |
| 2-1305-02 | 34.3             | 99.8                  | 3,285,790  | 779,863      |
| 2-1305-03 | 39.5             | 99.8                  | 3,302,698  | 817,107      |
| 2-1314-01 | 43.3             | 99.9                  | 3,262,059  | 825,726      |
| 2-1314-02 | 42.6             | 99.8                  | 3,199,067  | 808,578      |
| 2-1314-03 | 42.5             | 99.8                  | 3,303,886  | 850,776      |
| 2-1325-01 | 35.6             | 99.8                  | 3,251,986  | 787,124      |
| 2-1325-02 | 38.9             | 99.8                  | 3,196,285  | 778,569      |
| 2-1325-03 | 37.7             | 99.8                  | 3,222,418  | 801,211      |
| 2-1329-01 | 36.5             | 99.8                  | 3,232,169  | 803,678      |
| 2-1329-02 | 32.9             | 99.8                  | 3,218,677  | 793,568      |
| 2-1329-03 | 35.0             | 99.8                  | 3,192,710  | 810,297      |
| 2-1330-01 | 37.5             | 99.8                  | 3,189,790  | 791,981      |
| 2-1330-02 | 38.5             | 99.8                  | 3,199,170  | 789,259      |
| 2-1330-03 | 40.3             | 99.8                  | 3,177,628  | 803,498      |
| 2-1334-01 | 34.2             | 99.8                  | 3,242,908  | 785,564      |
| 2-1334-02 | 34.1             | 99.8                  | 3,219,078  | 784,236      |
| 2-1334-03 | 40.6             | 99.8                  | 3,201,641  | 805,279      |
| 2-1337-01 | 39.7             | 99.8                  | 3,183,547  | 813,369      |
| 2-1337-02 | 38.5             | 99.8                  | 3,205,460  | 811,795      |
| 2-1337-03 | 36.1             | 99.8                  | 3,202,101  | 830,779      |
| 2-1342-01 | 36.9             | 99.8                  | 3,197,399  | 794,754      |
| 2-1342-02 | 38.3             | 99.8                  | 3,204,267  | 796,247      |
| 2-1342-03 | 37.8             | 99.9                  | 3,219,052  | 818,424      |
| 2-1352-01 | 35.9             | 99.8                  | 3,260,340  | 801,579      |
| 2-1352-02 | 37.8             | 99.8                  | 3,183,155  | 787,276      |
| 2-1352-03 | 37.3             | 99.8                  | 3,218,739  | 809,995      |
| 2-1353-01 | 37.4             | 99.8                  | 3,216,606  | 793,050      |
| 2-1353-02 | 44.5             | 99.8                  | 3,200,287  | 796,362      |
| 2-1353-03 | 36.9             | 99.8                  | 3,189,371  | 802,718      |
| 2-1360-01 | 36.8             | 99.8                  | 3,169,886  | 788,171      |
| 2-1360-02 | 42.5             | 99.8                  | 3,140,750  | 787,847      |
| 2-1360-03 | 34.3             | 99.8                  | 3,124,812  | 796,198      |
| 2-1363-01 | 36.4             | 99.8                  | 3,221,195  | 783,155      |

| Sample ID        | Sequencing depth | Coverage of genome(%) | Total SNPs       | Total INDELS   |
|------------------|------------------|-----------------------|------------------|----------------|
| <b>2-1363-02</b> | 38.7             | 99.8                  | 3,195,709        | 777,179        |
| <b>2-1363-03</b> | 37.8             | 99.8                  | 3,183,254        | 795,188        |
| <b>2-1368-01</b> | 42.2             | 99.8                  | 3,257,014        | 828,150        |
| <b>2-1368-02</b> | 37.1             | 99.8                  | 3,136,446        | 798,958        |
| <b>2-1368-03</b> | 36.7             | 99.8                  | 3,258,165        | 839,574        |
| <b>2-1369-01</b> | 38.1             | 99.8                  | 3,212,820        | 795,253        |
| <b>2-1369-02</b> | 35.9             | 99.8                  | 3,163,723        | 787,114        |
| <b>2-1369-03</b> | 35.4             | 99.8                  | 3,169,142        | 805,978        |
| <b>2-1370-01</b> | 34.4             | 99.8                  | 3,218,321        | 790,796        |
| <b>2-1370-02</b> | 39.3             | 99.8                  | 3,208,498        | 785,190        |
| <b>2-1370-03</b> | 35.5             | 99.9                  | 3,201,081        | 804,470        |
| <b>2-1375-01</b> | 36.1             | 99.8                  | 3,276,890        | 798,938        |
| <b>2-1375-02</b> | 37.4             | 99.8                  | 3,173,223        | 778,049        |
| <b>2-1375-03</b> | 38.3             | 99.8                  | 3,247,270        | 814,844        |
| <b>2-1379-01</b> | 39.7             | 99.8                  | 3,233,335        | 801,286        |
| <b>2-1379-02</b> | 41.8             | 99.8                  | 3,202,157        | 798,073        |
| <b>2-1379-03</b> | 44.5             | 99.8                  | 3,200,016        | 814,284        |
| <b>Average</b>   | <b>38.4</b>      | <b>99.8</b>           | <b>3,210,237</b> | <b>804,635</b> |



**Table S2. Summary of number of *de novo* SNVs detected by filter method (DD-1) and Random Forest method (RF-2)**

| <b>FamilyID</b>        | <b>DD-1</b> | <b>RF-2</b> | <b>Overlap-Rate</b> | <b>exonic DD-1</b> | <b>exonic RF-2</b> |
|------------------------|-------------|-------------|---------------------|--------------------|--------------------|
| <b>2-0704</b>          | 398         | 48          | 91.67%              | 2                  | 1                  |
| <b>2-1116</b>          | 360         | 52          | 88.46%              | 1                  | 0                  |
| <b>2-1182</b>          | 407         | 76          | 88.16%              | 1                  | 1                  |
| <b>2-1186</b>          | 355         | 61          | 83.61%              | 1                  | 1                  |
| <b>2-1239</b>          | 392         | 74          | 83.78%              | 1                  | 2                  |
| <b>2-1244</b>          | 356         | 56          | 92.86%              | 0                  | 0                  |
| <b>2-1266</b>          | 439         | 63          | 93.65%              | 1                  | 2                  |
| <b>2-1268</b>          | 401         | 71          | 90.14%              | 1                  | 0                  |
| <b>2-1269</b>          | 418         | 52          | 82.69%              | 0                  | 0                  |
| <b>2-1272</b>          | 457         | 68          | 79.41%              | 3                  | 3                  |
| <b>2-1276</b>          | 393         | 66          | 81.82%              | 1                  | 1                  |
| <b>2-1280</b>          | 540         | 71          | 87.32%              | 1                  | 2                  |
| <b>2-1291</b>          | 313         | 80          | 80.00%              | 1                  | 1                  |
| <b>2-1295</b>          | 490         | 50          | 88.00%              | 3                  | 2                  |
| <b>2-1303</b>          | 373         | 40          | 80.00%              | 1                  | 1                  |
| <b>2-1305</b>          | 399         | 82          | 82.93%              | 3                  | 1                  |
| <b>2-1314</b>          | 370         | 66          | 86.36%              | 1                  | 1                  |
| <b>2-1325</b>          | 442         | 53          | 81.13%              | 0                  | 0                  |
| <b>2-1329</b>          | 419         | 59          | 86.44%              | 2                  | 2                  |
| <b>2-1330</b>          | 412         | 74          | 87.84%              | 0                  | 0                  |
| <b>2-1334</b>          | 331         | 54          | 81.48%              | 0                  | 1                  |
| <b>2-1337</b>          | 428         | 87          | 89.66%              | 0                  | 0                  |
| <b>2-1342</b>          | 372         | 77          | 85.71%              | 1                  | 1                  |
| <b>2-1352</b>          | 394         | 75          | 81.33%              | 3                  | 3                  |
| <b>2-1353</b>          | 427         | 67          | 83.58%              | 1                  | 0                  |
| <b>2-1360</b>          | 435         | 67          | 82.09%              | 2                  | 1                  |
| <b>2-1363</b>          | 364         | 63          | 85.71%              | 3                  | 4                  |
| <b>2-1368</b>          | 494         | 78          | 79.49%              | 1                  | 2                  |
| <b>2-1369</b>          | 363         | 42          | 95.24%              | 1                  | 1                  |
| <b>2-1370</b>          | 455         | 70          | 82.86%              | 3                  | 3                  |
| <b>2-1375</b>          | 368         | 89          | 80.90%              | 0                  | 0                  |
| <b>2-1379</b>          | 389         | 66          | 87.88%              | 1                  | 1                  |
| <b>Sum</b>             | 12954       | 2097        | -                   | 40                 | 38                 |
| <b>Average</b>         | 404.81      | 65.53       | 85.38%              | 1.25               | 1.19               |
| <b>Validation rate</b> |             |             |                     | 80%                | 95%                |

**Table S3. Summary of number of *de novo* indels detected by filter**

| <b>FamilyID</b>        | <b>No. of <i>de novo</i> Indels</b> | <b>No. after filtering simple repeat or dbSNP135</b> | <b>No. of in coding after filtering simple repeat or dbSNP135</b> |
|------------------------|-------------------------------------|------------------------------------------------------|-------------------------------------------------------------------|
| 2-0704                 | 16                                  | 8                                                    | 0                                                                 |
| 2-1116                 | 13                                  | 3                                                    | 0                                                                 |
| 2-1182                 | 20                                  | 4                                                    | 0                                                                 |
| 2-1186                 | 15                                  | 5                                                    | 0                                                                 |
| 2-1239                 | 16                                  | 7                                                    | 0                                                                 |
| 2-1244                 | 17                                  | 6                                                    | 0                                                                 |
| 2-1266                 | 11                                  | 4                                                    | 0                                                                 |
| 2-1268                 | 14                                  | 2                                                    | 0                                                                 |
| 2-1269                 | 10                                  | 6                                                    | 0                                                                 |
| 2-1272                 | 14                                  | 8                                                    | 0                                                                 |
| 2-1276                 | 20                                  | 4                                                    | 0                                                                 |
| 2-1280                 | 17                                  | 8                                                    | 0                                                                 |
| 2-1291                 | 13                                  | 4                                                    | 0                                                                 |
| 2-1295                 | 12                                  | 3                                                    | 0                                                                 |
| 2-1303                 | 5                                   | 1                                                    | 0                                                                 |
| 2-1305                 | 17                                  | 5                                                    | 0                                                                 |
| 2-1314                 | 15                                  | 4                                                    | 0                                                                 |
| 2-1325                 | 25                                  | 7                                                    | 0                                                                 |
| 2-1329                 | 14                                  | 6                                                    | 0                                                                 |
| 2-1330                 | 16                                  | 8                                                    | 0                                                                 |
| 2-1334                 | 22                                  | 7                                                    | 0                                                                 |
| 2-1337                 | 11                                  | 5                                                    | 1                                                                 |
| 2-1342                 | 10                                  | 4                                                    | 0                                                                 |
| 2-1352                 | 9                                   | 5                                                    | 0                                                                 |
| 2-1353                 | 7                                   | 4                                                    | 0                                                                 |
| 2-1360                 | 9                                   | 2                                                    | 0                                                                 |
| 2-1363                 | 17                                  | 5                                                    | 0                                                                 |
| 2-1368                 | 16                                  | 8                                                    | 0                                                                 |
| 2-1369                 | 21                                  | 7                                                    | 0                                                                 |
| 2-1370                 | 15                                  | 6                                                    | 1                                                                 |
| 2-1375                 | 11                                  | 5                                                    | 0                                                                 |
| 2-1379                 | 10                                  | 3                                                    | 0                                                                 |
| <b>Sum</b>             | <b>458</b>                          | <b>164</b>                                           | <b>2</b>                                                          |
| <b>Average</b>         | <b>14.31</b>                        | <b>5.13</b>                                          | <b>0.06</b>                                                       |
| <b>Validation rate</b> |                                     |                                                      | <b>100%</b>                                                       |

**Table S4. Summary of rare variants in probands**

| Sample ID      | All nonsyn SNVs (missense, nonsense, splicing) | rare nonsyn SNVs (not in dbSNP/1000G) | rare splicing | rare damaging missense (predicted as damaging by SIFT and PolyPhen-2) | rare nonsense | All indels | rare indel (not in dbSNP/1000G) | rare frameshift |
|----------------|------------------------------------------------|---------------------------------------|---------------|-----------------------------------------------------------------------|---------------|------------|---------------------------------|-----------------|
| 2-0704-03      | 8,785                                          | 305                                   | 75            | 45                                                                    | 7             | 453        | 342                             | 132             |
| 2-1116-03      | 8,935                                          | 232                                   | 71            | 37                                                                    | 5             | 458        | 328                             | 120             |
| 2-1182-03      | 9,142                                          | 221                                   | 82            | 38                                                                    | 7             | 447        | 336                             | 140             |
| 2-1186-03      | 8,984                                          | 177                                   | 75            | 22                                                                    | 3             | 462        | 337                             | 134             |
| 2-1239-03      | 8,980                                          | 260                                   | 73            | 41                                                                    | 6             | 433        | 314                             | 127             |
| 2-1244-03      | 8,860                                          | 194                                   | 77            | 32                                                                    | 5             | 433        | 317                             | 111             |
| 2-1266-03      | 8,828                                          | 203                                   | 69            | 35                                                                    | 9             | 435        | 330                             | 122             |
| 2-1268-03      | 8,817                                          | 193                                   | 79            | 23                                                                    | 8             | 457        | 336                             | 127             |
| 2-1269-03      | 8,790                                          | 195                                   | 74            | 35                                                                    | 4             | 422        | 309                             | 115             |
| 2-1272-03      | 8,926                                          | 231                                   | 80            | 39                                                                    | 9             | 439        | 325                             | 129             |
| 2-1276-03      | 8,936                                          | 228                                   | 77            | 25                                                                    | 6             | 473        | 349                             | 123             |
| 2-1280-03      | 9,178                                          | 315                                   | 85            | 58                                                                    | 12            | 451        | 329                             | 128             |
| 2-1291-03      | 8,965                                          | 207                                   | 74            | 32                                                                    | 8             | 418        | 309                             | 118             |
| 2-1295-03      | 8,969                                          | 259                                   | 72            | 49                                                                    | 7             | 412        | 310                             | 112             |
| 2-1303-03      | 8,898                                          | 166                                   | 66            | 24                                                                    | 6             | 428        | 310                             | 111             |
| 2-1305-03      | 9,312                                          | 441                                   | 72            | 81                                                                    | 6             | 437        | 316                             | 119             |
| 2-1314-03      | 9,365                                          | 296                                   | 87            | 36                                                                    | 8             | 485        | 364                             | 141             |
| 2-1325-03      | 8,954                                          | 199                                   | 73            | 41                                                                    | 5             | 427        | 304                             | 121             |
| 2-1329-03      | 8,796                                          | 173                                   | 62            | 26                                                                    | 6             | 446        | 329                             | 169             |
| 2-1330-03      | 8,958                                          | 184                                   | 72            | 28                                                                    | 3             | 456        | 345                             | 127             |
| 2-1334-03      | 8,932                                          | 212                                   | 79            | 43                                                                    | 4             | 442        | 329                             | 124             |
| 2-1337-03      | 8,981                                          | 214                                   | 65            | 38                                                                    | 4             | 454        | 343                             | 131             |
| 2-1342-03      | 8,891                                          | 237                                   | 81            | 47                                                                    | 6             | 418        | 305                             | 132             |
| 2-1352-03      | 8,970                                          | 162                                   | 63            | 30                                                                    | 5             | 433        | 314                             | 113             |
| 2-1353-03      | 9,023                                          | 194                                   | 73            | 41                                                                    | 3             | 433        | 317                             | 127             |
| 2-1360-03      | 8,780                                          | 192                                   | 76            | 34                                                                    | 4             | 446        | 332                             | 143             |
| 2-1363-03      | 8,919                                          | 188                                   | 75            | 38                                                                    | 2             | 426        | 309                             | 119             |
| 2-1368-03      | 9,233                                          | 340                                   | 75            | 85                                                                    | 9             | 444        | 326                             | 120             |
| 2-1369-03      | 8,995                                          | 192                                   | 74            | 38                                                                    | 8             | 450        | 339                             | 122             |
| 2-1370-03      | 9,080                                          | 205                                   | 78            | 41                                                                    | 6             | 468        | 351                             | 140             |
| 2-1375-03      | 9,087                                          | 349                                   | 73            | 73                                                                    | 10            | 445        | 324                             | 109             |
| 2-1379-03      | 9,155                                          | 232                                   | 80            | 37                                                                    | 11            | 463        | 356                             | 134             |
| <b>Average</b> | <b>8,982</b>                                   | <b>231</b>                            | <b>75</b>     | <b>40</b>                                                             | <b>6</b>      | <b>444</b> | <b>328</b>                      | <b>126</b>      |

**Table S5. Annotations of ASD clinically relevant variants**

| Family ID | Chr | Coordinate (hg19) | Gene     | Accession    | Coding_Change   | Protein_Change | Effect <sup>a</sup> | Proband-Gtype | State <sup>b</sup> | SIFT <sup>c</sup> | Polyphen-2 <sup>d</sup> | Prediction <sup>e</sup> | MutationTaser <sup>f</sup> | PANTHER (subPSEC) | LRT      | GERP  | PHYLOP   |
|-----------|-----|-------------------|----------|--------------|-----------------|----------------|---------------------|---------------|--------------------|-------------------|-------------------------|-------------------------|----------------------------|-------------------|----------|-------|----------|
| 2-1342    | 1   | 16376358          | CLCNKB   | NM_001165945 | c.C408G         | p.I136M        | M                   | CG            | D                  | T(0.14)           | B(0.014)                | B                       | PP(0.999)                  | -4.39652          | 0.4905   | -6.31 | 0.059562 |
| 2-1272    | 1   | 113235478         | MOV10    | NM_001130079 | c.G1067A        | p.R356Q        | M                   | GA            | D                  | D(0.01)           | PD(0.581)               | PD                      | DC(0.999)                  | -4.05166          | 0.99993  | 3.35  | 0.994954 |
| 2-1329    | 1   | 159846398         | CCDC19   | NM_012337    | c.G1300A        | p.A434T        | M                   | CT            | D                  | T(0.41)           | B(0.003)                | B                       | PP(0.999)                  | -0.7287           | 0.492197 | -3.74 | 0.029105 |
| 2-1363    | 1   | 201687561         | NAV1     | NM_020443    | c.C904A         | p.R302S        | M                   | CA            | D                  | D(0)              | D(0.956)                | D                       | PP(0.691)                  | -2.86073          | 0.999994 | 3.66  | 0.978374 |
| 2-1370    | 10  | 24802273          | KIAA1217 | NM_019590    | c.T2087C        | p.L696P        | M                   | TC            | D                  | D(0.03)           | D(0.999)                | D                       | DC(0.998)                  | -2.24912          | 0.999941 | 5.46  | 0.998258 |
| 2-1370    | 10  | 75294480          | USP54    | NM_152586    | c.11194dup      | p.S399Efs      | F                   | 1bp ins       | D                  | -                 | -                       | D                       | DC(1)                      | -                 | -        | -     | -        |
| 2-1329    | 10  | 81702258          | SFTPD    | NM_003019    | c.C319T         | p.P107S        | M                   | GA            | D                  | -                 | PD(0.731)               | PD                      | PP(0.946)                  | -1.60762          | 0.760274 | 4.11  | 0.998875 |
| 2-1295    | 10  | 105768025         | SLK      | NM_014720    | c.C2695T        | p.R899C        | M                   | CT            | D                  | D(0.01)           | D(1)                    | D                       | DC(0.999)                  | -8.11095          | 1        | 5.59  | 0.999222 |
| 2-1276    | 11  | 12316171          | MICALCL  | NM_032867    | c.1193_1194insA | p.S399Lfs      | F                   | 1bp ins       | D                  | -                 | -                       | D                       | DC(1)                      | -                 | -        | -     | -        |
| 2-1305    | 11  | 34107924          | CAPRIN1  | NM_005898    | c.C1195T        | p.Q399X        | N                   | CT            | D                  | -                 | -                       | D                       | DC(1)                      | -                 | 1        | 5.57  | 0.999197 |
| 2-1360    | 11  | 64852255          | ZFPL1    | NM_006782    | c.G85A          | p.V29I         | M                   | GA            | D                  | T(0.11)           | D(0.957)                | U                       | DC(0.999)                  | -1.98159          | 0.999941 | 3.51  | 0.982783 |
| 2-1370    | 11  | 92600180          | FAT3     | NM_001008781 | c.G11932A       | p.V3978M       | M                   | GA            | D                  | D(0)              | B(0.419)                | U                       | DC(0.959)                  | -                 | -        | -     | -        |
| 2-1244    | 12  | 2775890           | CACNA1C  | NM_001129842 | c.G4565A        | p.R1522Q       | M                   | GA            | I                  | D(0)              | D(0.988)                | D                       | DC(0.999)                  | -5.30958          | -        | -     | -        |
| 2-1266    | 12  | 65269243          | TBC1D30  | NM_015279    | c.C1961T        | p.A654V        | M                   | CT            | D                  | T(1)              | B(0)                    | B                       | -                          | -                 | -        | -     | -        |
| 2-1314    | 12  | 123213933         | HCAR1    | NM_032554    | c.C954T         | p.L318L        | S                   | GA            | D                  | -                 | -                       | -                       | PP(0.729)                  | -                 | -        | -     | -        |
| 2-1291    | 14  | 105354151         | KIAA0284 | NM_015005    | c.G3365A        | p.R1122H       | M                   | GA            | D                  | D(0.02)           | D(0.992)                | D                       | PP(0.931)                  | -5.64741          | -        | -     | -        |
| 2-1368    | 15  | 49426143          | COPS2    | NM_001143887 | c.C899T         | p.P300L        | M                   | GA            | D                  | D(0)              | D(0.987)                | D                       | DC(0.999)                  | -3.73227          | 1        | 5.58  | 0.999759 |
| 2-1239    | 17  | 1411432           | INPP5K   | NM_001135642 | c.G415A         | p.G139S        | M                   | CT            | D                  | T(0.92)           | B(0.001)                | B                       | PP(0.999)                  | -4.30698          | 0.999756 | 0.575 | 0.078338 |
| 2-0704    | 17  | 43111636          | DCAKD    | NM_001128631 | c.C235A         | p.R79R         | S                   | GT            | D                  | -                 | -                       | -                       | PP(0.729)                  | -                 | -        | -     | -        |
| 2-1276    | 2   | 25466800          | DNMT3A   | NM_175629    | c.C1903T        | p.R635W        | M                   | GA            | D                  | D(0.01)           | D(0.958)                | D                       | DC(0.999)                  | -7.01189          | 1        | 4.03  | 0.990943 |
| 2-1329    | 2   | 39249972          | SOS1     | NM_005633    | c.G1597A        | p.E533K        | M                   | CT            | I                  | D(0.01)           | D(0.977)                | D                       | DC(0.999)                  | -3.39319          | 1        | 5.57  | 0.999202 |
| 2-1116    | 2   | 50724817          | NRXN1    | NM_001135659 | c.C2653T        | p.H885Y        | M                   | GA            | I                  | D(0.01)           | D(0.983)                | D                       | PP(0.923)                  | -5.58385          | -        | -     | -        |
| 2-1116    | 2   | 97215971          | ARID5A   | NM_212481    | c.G359T         | p.G120V        | M                   | GT            | D                  | D(0.05)           | D(0.982)                | D                       | DC(0.945)                  | -3.6209           | 0.999918 | 3.95  | 0.998955 |
| 2-1379    | 2   | 153575211         | ARL6IP6  | NM_152522    | c.C73G          | p.R25G         | M                   | CG            | D                  | T(0.32)           | PD(0.878)               | U                       | PP(0.991)                  | -                 | 0.342823 | -3.5  | 0.089324 |
| 2-1291    | 2   | 166152415         | SCN2A    | NM_001040143 | c.C82T          | p.R28C         | M                   | CT            | I                  | D(0.04)           | D(0.972)                | D                       | DC(0.991)                  | -7.05459          | 0.054772 | 5.2   | 0.998825 |
| 2-1337    | 2   | 166170551         | SCN2A    | NM_001040143 | c.1317_1348del  | p.440_450del   | F                   | 32bp del      | D                  | -                 | -                       | D                       | -                          | -                 | -        | -     | -        |
| 2-1334    | 2   | 200137173         | SATB2    | NM_015265    | c.C1963T        | p.P655S        | M                   | GA            | I                  | D(0.03)           | D(0.999)                | D                       | DC(0.985)                  | -2.17544          | 1        | 5.45  | 0.999714 |
| 2-1352    | 20  | 17923824          | SNX5     | NM_014426    | c.A1094G        | p.K365R        | M                   | TC            | D                  | T(0.13)           | B(0.04)                 | B                       | DC(0.999)                  | -4.35885          | 1        | 5.3   | 0.997996 |
| 2-1269    | 20  | 62055529          | KCNQ2    | NM_172109    | c.1247+1G>A     | -              | SS                  | CT            | I                  | -                 | -                       | D                       | DC(0.999)                  | -                 | -        | -     | -        |
| 2-1363    | 22  | 18387403          | MICAL3   | NM_001122731 | c.A467G         | p.H156R        | M                   | TC            | D                  | D(0)              | D(1)                    | D                       | PP(0.999)                  | -                 | -        | -     | -        |
| 2-1272    | 3   | 47957453          | MAP4     | NM_001134364 | c.A1864G        | p.M622V        | M                   | TC            | D                  | T(0.67)           | B(0.004)                | B                       | PP(0.999)                  | -2.03529          | 0.580192 | -2.24 | 0.076731 |
| 2-1368    | 3   | 48621941          | COL7A1   | NM_000094    | c.C4096T        | p.R1366W       | M                   | GA            | D                  | -                 | unknown(0)              | unknown                 | PP(0.995)                  | -7.16169          | 0.702023 | 2.91  | 0.986511 |
| 2-1239    | 3   | 49064457          | IMPDP2   | NM_000884    | c.G555C         | p.L185F        | M                   | CG            | D                  | D(0)              | D(0.978)                | D                       | DC(0.999)                  | -4.57509          | 1        | 3.72  | 0.945302 |
| 2-1370    | 3   | 120628487         | STXBPL5  | NM_014980    | c.G62A          | p.G21D         | M                   | GA            | D                  | T(0.12)           | B(0.084)                | B                       | PP(0.654)                  | -1.65615          | 0.998397 | 4.95  | 0.999723 |
| 2-1182    | 5   | 422895            | AHRH     | NM_020731    | c.G505G         | p.Q169E        | M                   | CG            | D                  | T(0.08)           | B(0.284)                | B                       | DC(0.983)                  | -1.76868          | 1        | 4.49  | 0.997447 |
| 2-1239    | 5   | 156679654         | ITK      | NM_005546    | c.G1829A        | p.R610H        | M                   | GA            | D                  | T(0.32)           | B(0)                    | B                       | PP(0.932)                  | -3.55725          | 0.937182 | 3.09  | 0.964439 |
| 2-1272    | 5   | 168175351         | SLIT3    | NM_003062    | c.G2226T        | p.G742G        | S                   | CA            | D                  | -                 | -                       | -                       | PP(0.648)                  | -                 | -        | -     | -        |
| 2-1369    | 6   | 152771947         | SYNE1    | NM_033071    | c.C3229T        | p.P1077S       | M                   | GA            | D                  | -                 | B(0.264)                | possibly B              | PP(0.745)                  | -3.86778          | 0.999809 | 5.73  | 0.9998   |
| 2-1186    | 6   | 153075412         | VIP      | NM_003381    | c.T719A         | p.Y73X         | N                   | TA            | D                  | -                 | -                       | D                       | DC(0.999)                  | -                 | 0.997782 | 1.55  | 0.893102 |
| 2-1295    | 7   | 127670456         | LRRC4    | NM_022143    | c.C238G         | p.L80V         | M                   | GC            | D                  | D(0)              | D(0.996)                | D                       | DC(0.957)                  | -5.611            | 0.99999  | 4.11  | 0.999151 |
| 2-1303    | 7   | 133842813         | LRGUK    | NM_144648    | c.A696G         | p.G232G        | S                   | AG            | D                  | -                 | -                       | -                       | PP(0.729)                  | -                 | -        | -     | -        |
| 2-1352    | 8   | 10583692          | SOX7     | NM_031439    | c.G723A         | p.P241P        | S                   | CT            | D                  | -                 | -                       | -                       | PP(0.729)                  | -                 | -        | -     | -        |
| 2-1272    | 8   | 61742924          | CHD7     | NM_017780    | c.G3566A        | p.R1189H       | M                   | GA            | I                  | D(0)              | D(1)                    | D                       | DC(0.990)                  | -7.94252          | -        | -     | -        |
| 2-1363    | 8   | 104439424         | DCAF13   | NM_015420    | c.T1024G        | p.C342G        | M                   | TG            | D                  | T(0.38)           | B(0.042)                | B                       | DC(0.832)                  | -1.9283           | 0.999985 | 5.51  | 0.998337 |
| 2-1363    | 9   | 133942350         | LAMC3    | NM_006059    | c.G2351A        | p.R784Q        | M                   | GA            | D                  | T(0.06)           | B(0.159)                | B                       | PP(0.982)                  | -4.37859          | 0.983004 | 3.33  | 0.98462  |
| 2-1352    | 9   | 140710435         | EHMT1    | NM_024757    | c.C2395G        | p.P1099A       | M                   | CG            | I                  | D(0)              | D(0.991)                | D                       | DC(0.992)                  | -4.71053          | 1        | 4.95  | 0.998448 |
| 2-1280    | X   | 3248358           | MXRA5    | NM_015419    | c.A410G         | p.N137S        | M                   | TC            | D                  | D(0)              | D(0.956)                | D                       | DC(0.513)                  | -                 | 0.999553 | 3.33  | 0.986939 |
| 2-1303    | X   | 8522080           | KAL1     | NM_000216    | c.C1267T        | p.R423X        | N                   | AA            | D                  | -                 | -                       | D                       | DC(0.999)                  | -                 | 0.999999 | -4.56 | 0.21329  |
| 2-1330    | X   | 10104728          | WWC3     | NM_015691    | c.G2819A        | p.R940Q        | M                   | AA            | D                  | D(0)              | D(1)                    | D                       | DC(0.999)                  | -4.76344          | 0.999999 | 5.4   | 0.999687 |
| 2-1266    | X   | 30327222          | NR0B1    | NM_000475    | c.G259T         | p.A87S         | M                   | CA            | D                  | D(0)              | D(0.999)                | D                       | PP(0.930)                  | -                 | 0.996977 | 3.72  | 0.998193 |
| 2-1330    | X   | 32364157          | DMD      | NM_004009    | c.G5477T        | p.R1826I       | M                   | AA            | I                  | D(0)              | D(0.933)                | D                       | DC(0.772)                  | -4.80584          | 0.999436 | 5.4   | 0.999041 |
| 2-1353    | X   | 64719083          | ZC3H12B  | NM_001010888 | c.G953A         | p.R318Q        | M                   | AA            | I                  | D(0.01)           | D(0.973)                | D                       | DC(0.998)                  | -5.98218          | -        | -     | -        |
| 2-1352    | X   | 70386983          | NLGN3    | NM_001166660 | c.G916A         | p.V306M        | M                   | AA            | I                  | T(0.08)           | B(0.052)                | B                       | PP(0.999)                  | -4.54339          | 0.999973 | 4.79  | 0.999658 |
| 2-1375    | X   | 129150017         | BCORL1   | NM_021946    | c.G3269C        | p.R1090P       | M                   | CC            | I                  | D(0)              | D(0.909)                | D                       | PP(0.722)                  | -4.62477          | 0.994831 | 3.62  | 0.999269 |

| Family ID | Chr | Coordinate (hg19) | Gene    | Accession    | Coding_Change | Protein_Change | Effect <sup>a</sup> | Proband-Gtype | State <sup>b</sup> | SIFT <sup>c</sup> | Polyphen-2 <sup>d</sup> | Prediction <sup>e</sup> | MutationTaser <sup>f</sup> | PANTHER (subPSEC) | LRT      | GERP | PHYLOP   |
|-----------|-----|-------------------|---------|--------------|---------------|----------------|---------------------|---------------|--------------------|-------------------|-------------------------|-------------------------|----------------------------|-------------------|----------|------|----------|
| 2-1353    | X   | 135795456         | ARHGEF6 | NM_004840    | c.G806T       | p.R269I        | M                   | AA            | I                  | D(0)              | D(0.905)                | D                       | DC(0.999)                  | -4.78686          | 1        | 4.7  | 0.985039 |
| 2-1269    | X   | 148069012         | AFF2    | NM_001170628 | c.G2662A      | p.V888I        | M                   | AA            | I                  | D(0)              | D(0.957)                | D                       | -                          | -3.52349          | 0.999999 | 5.52 | 0.999736 |

<sup>a</sup>Predicted effect of mutation by ANNOVAR. F: frameshift, M: missense, N: nonsense, S: synonymous, SS: splice site

<sup>b</sup>Inheritance state of the mutation. D: de novo, I: inherited

<sup>c</sup>Predicted functional effect by SIFT. D: damaging, T: tolerated

<sup>d</sup>Predicted functional effect by Polyphen-2. B: benign, D: probably deleterious, PD: possibly deleterious

<sup>e</sup>Concluded prediction based on SIFT and Polyphen-2. B: benign, PB: possibly benign (benign based on one tool), PD: possibly deleterious (deleterious based on one tool), D: deleterious, U: undetermined (when SIFT and Polyphen-2 gave opposite prediction)

<sup>f</sup>Predicted functional effect by MutationTaser. DC: disease cause, PP: Polymorphism

**Table S5. Annotations of ASD clinically relevant variants (cont'd)**

| Family ID | Chr | Coordinate (hg19) | Gene     | Accession    | Coding_C change | Protein Change | Exome captured | dbSNP       | ESP6500(E) (%) /1000G(G) (%) /HGMD(H) | Exome papers                             | Known ASD gene | OMIM                                                                          | Known inheritance   | MGI (behavior /nervous system) | Genotype  |
|-----------|-----|-------------------|----------|--------------|-----------------|----------------|----------------|-------------|---------------------------------------|------------------------------------------|----------------|-------------------------------------------------------------------------------|---------------------|--------------------------------|-----------|
| 2-1342    | 1   | 16376358          | CLCNKB   | NM_001165945 | c.C408G         | p.I136M        | TRUE           | -           | -                                     | -                                        | FALSE          | Bartter syndrome                                                              | recessive           | -                              | -         |
| 2-1272    | 1   | 113235478         | MOV10    | NM_001130079 | c.G1067A        | p.R356Q        | TRUE           | -           | -                                     | -                                        | FALSE          | -                                                                             | -                   | -                              | -         |
| 2-1329    | 1   | 159846398         | CCDC19   | NM_012337    | c.G1300A        | p.A434T        | TRUE           | -           | 0.0077(E)                             | -                                        | FALSE          | -                                                                             | -                   | -                              | -         |
| 2-1363    | 1   | 201687561         | NAV1     | NM_020443    | c.C904A         | p.R302S        | FALSE          | rs146415554 | 0.0077(E)                             | -                                        | FALSE          | -                                                                             | -                   | -                              | -         |
| 2-1370    | 10  | 24802273          | KIAA1217 | NM_019590    | c.T2087C        | p.L696P        | TRUE           | -           | -                                     | -                                        | FALSE          | -                                                                             | -                   | -                              | -         |
| 2-1370    | 10  | 75294480          | USP54    | NM_152586    | c.11194dup      | p.S399Efs      | TRUE           | -           | -                                     | -                                        | FALSE          | -                                                                             | -                   | -                              | -         |
| 2-1329    | 10  | 81702258          | SFTPD    | NM_003019    | c.C319T         | p.P107S        | TRUE           | -           | -                                     | -                                        | FALSE          | -                                                                             | -                   | behavior/nervous system        | hom       |
| 2-1295    | 10  | 105768025         | SLK      | NM_014720    | c.C2695T        | p.R899C        | TRUE           | -           | -                                     | -                                        | FALSE          | -                                                                             | -                   | -                              | -         |
| 2-1276    | 11  | 12316171          | MICALCL  | NM_032867    | c.1193_1194insA | p.S399Lfs      | TRUE           | -           | -                                     | Neale: Q581E                             | FALSE          | -                                                                             | -                   | -                              | -         |
| 2-1305    | 11  | 34107924          | CAPRIN1  | NM_005898    | c.C1195T        | p.Q399X        | TRUE           | -           | -                                     | -                                        | FALSE          | -                                                                             | -                   | behavior/nervous system        | hom       |
| 2-1360    | 11  | 64852255          | ZFPL1    | NM_006782    | c.G85A          | p.V29I         | TRUE           | -           | -                                     | -                                        | FALSE          | -                                                                             | -                   | -                              | -         |
| 2-1370    | 11  | 92600180          | FAT3     | NM_001008781 | c.G11932A       | p.V3978M       | TRUE           | -           | -                                     | -                                        | FALSE          | -                                                                             | -                   | nervous system                 | hom       |
| 2-1244    | 12  | 2775890           | CACNA1C  | NM_001129842 | c.G4565A        | p.R1522Q       | TRUE           | -           | -                                     | -                                        | TRUE           | Brugada syndrome/Timothy syndrome                                             | dominant            | behavior                       | het       |
| 2-1266    | 12  | 65269243          | TBC1D30  | NM_015279    | c.C1961T        | p.A654V        | TRUE           | -           | 0.001(G)                              | -                                        | FALSE          | -                                                                             | -                   | -                              | -         |
| 2-1314    | 12  | 123213933         | HCAR1    | NM_032554    | c.C954T         | p.L318L        | TRUE           | -           | -                                     | -                                        | FALSE          | -                                                                             | -                   | -                              | -         |
| 2-1291    | 14  | 105354151         | KIAA0284 | NM_015005    | c.G3365A        | p.R1122H       | TRUE           | -           | 0.0083(E)                             | -                                        | FALSE          | -                                                                             | -                   | -                              | -         |
| 2-1368    | 15  | 49426143          | COP2     | NM_001143887 | c.C899T         | p.P300L        | TRUE           | -           | -                                     | -                                        | FALSE          | -                                                                             | -                   | -                              | -         |
| 2-1239    | 17  | 1411432           | INPP5K   | NM_001135642 | c.G415A         | p.G139S        | TRUE           | rs61733755  | 0.3537(E)                             | -                                        | FALSE          | -                                                                             | -                   | -                              | -         |
| 2-0704    | 17  | 43111636          | DCAKD    | NM_001128631 | c.C235A         | p.R79R         | TRUE           | -           | -                                     | -                                        | FALSE          | -                                                                             | -                   | -                              | -         |
| 2-1276    | 2   | 25466800          | DNMT3A   | NM_175629    | c.C1903T        | p.R635W        | TRUE           | rs144689354 | 0.0079(E)                             | Sanders: V665L                           | FALSE          | -                                                                             | -                   | nervous system                 | condition |
| 2-1329    | 2   | 39249972          | SOS1     | NM_005633    | c.G1597A        | p.E533K        | TRUE           | -           | -                                     | -                                        | FALSE          | Fibromatosis, gingival/Noonan syndrome                                        | dominant            | nervous system                 | het/hom   |
| 2-1116    | 2   | 50724817          | NRXN1    | NM_001135659 | c.C2653T        | p.H885Y        | TRUE           | -           | 0.0994(E)                             | Lossifov: Y587X                          | TRUE           | Pitt-Hopkins-like syndrome/Schizophrenia, susceptibility to                   | dominant /recessive | behavior/nervous system        | hom       |
| 2-1116    | 2   | 97215971          | ARID5A   | NM_212481    | c.G359T         | p.G120V        | TRUE           | -           | -                                     | -                                        | FALSE          | -                                                                             | -                   | -                              | -         |
| 2-1379    | 2   | 153575211         | ARL6IP6  | NM_152522    | c.C73G          | p.R25G         | TRUE           | -           | -                                     | -                                        | FALSE          | -                                                                             | -                   | -                              | -         |
| 2-1291    | 2   | 166152415         | SCN2A    | NM_001040143 | c.C82T          | p.R28C         | TRUE           | -           | 0.0384(E)                             | Lossifov: T1420M; Sanders: C959X, G1013X | TRUE           | Epileptic encephalopathy, early infantile/Seizures, benign familial infantile | dominant            | behavior/nervous system        | hom       |
| 2-1337    | 2   | 166170551         | SCN2A    | NM_001040143 | c.1317_1348del  | p.440_450del   | TRUE           | -           | -                                     | Lossifov: T1420M; Sanders: C959X, G1013X | TRUE           | Epileptic encephalopathy, early infantile/Seizures, benign familial infantile | dominant            | behavior/nervous system        | hom       |
| 2-1334    | 2   | 200137173         | SATB2    | NM_015265    | c.C1963T        | p.P655S        | TRUE           | -           | -                                     | -                                        | TRUE           | Cleft palate and mental retardation                                           | dominant /recessive | -                              | -         |

| Family ID | Chr | Coordinate (hg19) | Gene    | Accession     | Coding_C change | Protein Change | Exome captured | dbSNP       | ESP6500(E) (%) /1000G(G) (%) /HGMD(H) | Exome papers    | Known ASD gene | OMIM                                                                                                                                                                                                                                                           | Known inheritance   | MGI (behavior /nervous system) | Genotype |
|-----------|-----|-------------------|---------|---------------|-----------------|----------------|----------------|-------------|---------------------------------------|-----------------|----------------|----------------------------------------------------------------------------------------------------------------------------------------------------------------------------------------------------------------------------------------------------------------|---------------------|--------------------------------|----------|
| 2-1352    | 20  | 17923824          | SNX5    | NM_014426     | c.A1094G        | p.K365R        | FALSE          | -           | -                                     | Lossifov: A236V | FALSE          | -                                                                                                                                                                                                                                                              | -                   | -                              | -        |
| 2-1269    | 20  | 62055529          | KCNQ2   | NM_172109     | c.1247+1G >A    | -              | FALSE          | -           | -                                     | -               | FALSE          | Epileptic encephalopathy, early infantile/Myokymia/Seizures, benign neonatal                                                                                                                                                                                   | dominant            | behavior/nervous system        | het      |
| 2-1363    | 22  | 18387403          | MICAL3  | NM_00112273_1 | c.A467G         | p.H156R        | FALSE          | -           | -                                     | -               | FALSE          | -                                                                                                                                                                                                                                                              | -                   | -                              | -        |
| 2-1272    | 3   | 47957453          | MAP4    | NM_00113436_4 | c.A1864G        | p.M622V        | TRUE           | -           | -                                     | O'Roak: D122W   | FALSE          | -                                                                                                                                                                                                                                                              | -                   | -                              | -        |
| 2-1368    | 3   | 48621941          | COL7A1  | NM_000094     | c.C4096T        | p.R1366W       | TRUE           | rs147089666 | 0.0308(E)                             | -               | FALSE          | EBD inversa/EBD, Bart type/EBD, localisata variant/Epidermolysis bullosa dystrophica, AD/Epidermolysis bullosa dystrophica, AR/Epidermolysis bullosa pruriginosa/Epidermolysis bullosa, pretibial/Toenail dystrophy, isolated/Transient bullous of the newborn | dominant/recessive  | -                              | -        |
| 2-1239    | 3   | 49064457          | IMPDH2  | NM_000884     | c.G555C         | p.L185F        | TRUE           | -           | -                                     | -               | FALSE          | IMPDH2 enzyme activity, variation in                                                                                                                                                                                                                           | dominant            | -                              | -        |
| 2-1370    | 3   | 120628487         | STXBPSL | NM_014980     | c.G62A          | p.G21D         | TRUE           | -           | -                                     | -               | FALSE          | -                                                                                                                                                                                                                                                              | -                   | -                              | -        |
| 2-1182    | 5   | 422895            | AHRR    | NM_020731     | c.C505G         | p.Q169E        | TRUE           | -           | -                                     | -               | FALSE          | -                                                                                                                                                                                                                                                              | -                   | -                              | -        |
| 2-1239    | 5   | 156679654         | ITK     | NM_005546     | c.G1829A        | p.R610H        | TRUE           | rs138438785 | 0.0154(E)                             | -               | FALSE          | Lymphoproliferative syndrome, EBV-associated, autosomal                                                                                                                                                                                                        | dominant            | -                              | -        |
| 2-1272    | 5   | 168175351         | SLIT3   | NM_003062     | c.G2226T        | p.G742G        | TRUE           | -           | -                                     | -               | FALSE          | -                                                                                                                                                                                                                                                              | -                   | -                              | -        |
| 2-1369    | 6   | 152771947         | SYNE1   | NM_033071     | c.C3229T        | p.P1077S       | TRUE           | -           | -                                     | -               | FALSE          | Emery-Dreifuss muscular dystrophy/Spinocerebellar ataxia                                                                                                                                                                                                       | dominant /recessive | behavior/nervous system        | hom      |
| 2-1186    | 6   | 153075412         | VIP     | NM_003381     | c.T219A         | p.Y73X         | FALSE          | -           | -                                     | -               | FALSE          | -                                                                                                                                                                                                                                                              | -                   | behavior                       | het      |
| 2-1295    | 7   | 127670456         | LRRC4   | NM_022143     | c.C238G         | p.L80V         | TRUE           | -           | -                                     | -               | FALSE          | -                                                                                                                                                                                                                                                              | -                   | behavior                       | hom      |
| 2-1303    | 7   | 133842813         | LRGUK   | NM_144648     | c.A696G         | p.G232G        | TRUE           | -           | -                                     | -               | FALSE          | -                                                                                                                                                                                                                                                              | -                   | -                              | -        |
| 2-1352    | 8   | 10583692          | SOX7    | NM_031439     | c.G723A         | p.P241P        | TRUE           | -           | -                                     | -               | FALSE          | -                                                                                                                                                                                                                                                              | -                   | -                              | -        |
| 2-1272    | 8   | 61742924          | CHD7    | NM_017780     | c.G3566A        | p.R1189H       | TRUE           | -           | -                                     | O'Roak: G996S   | TRUE           | CHARGE syndrome/Hypogonadotropic hypogonadism with or without anosmia/Scoliosis, idiopathic                                                                                                                                                                    | dominant            | behavior/nervous system        | het      |
| 2-1363    | 8   | 104439424         | DCAF13  | NM_015420     | c.T1024G        | p.C342G        | FALSE          | -           | -                                     | -               | FALSE          | -                                                                                                                                                                                                                                                              | -                   | -                              | -        |
| 2-1363    | 9   | 133942350         | LAMC3   | NM_006059     | c.G2351A        | p.R784Q        | TRUE           | -           | 0.0231(E)                             | -               | FALSE          | Cortical malformations, occipital                                                                                                                                                                                                                              | recessive           | nervous system                 | hom      |
| 2-1352    | 9   | 140710435         | EHMT1   | NM_024757     | c.C3295G        | p.P1099A       | TRUE           | -           | -                                     | -               | TRUE           | Kleefstra syndrome                                                                                                                                                                                                                                             | dominant /recessive | behavior/nervous system        | het      |
| 2-1280    | X   | 3248358           | MXRA5   | NM_015419     | c.A410G         | p.N137S        | TRUE           | -           | -                                     | -               | FALSE          | -                                                                                                                                                                                                                                                              | -                   | -                              | -        |
| 2-1303    | X   | 8522080           | KAL1    | NM_000216     | c.C1267T        | p.R423X        | TRUE           | -           | R423X(H)                              | -               | FALSE          | Hypogonadotropic hypogonadism with or without anosmia (Kallmann syndrome 1)                                                                                                                                                                                    | X-linked            | -                              | -        |
| 2-1330    | X   | 10104728          | WWC3    | NM_015691     | c.G2819A        | p.R940Q        | TRUE           | -           | -                                     | -               | FALSE          | -                                                                                                                                                                                                                                                              | -                   | -                              | -        |
| 2-1266    | X   | 30327222          | NROB1   | NM_000475     | c.G259T         | p.A87S         | TRUE           | -           | -                                     | -               | FALSE          | 46XY sex reversal 2, dosage-sensitive/Adrenal                                                                                                                                                                                                                  | X-linked            | -                              | -        |

| Family ID | Chr | Coordinate (hg19) | Gene    | Accession    | Coding_Change | Protein Change | Exome captured | dbSNP | ESP6500(E) (%) /1000G(G) (%) /HGMD(H) | Exome papers   | Known ASD gene | OMIM                                                                              | Known inheritance | MGI (behavior/nervous system) | Genotype |
|-----------|-----|-------------------|---------|--------------|---------------|----------------|----------------|-------|---------------------------------------|----------------|----------------|-----------------------------------------------------------------------------------|-------------------|-------------------------------|----------|
|           |     |                   |         |              |               |                |                |       |                                       |                |                | hypoplasia, congenital, with hypogonadotropic hypogonadism                        |                   |                               |          |
| 2-1330    | X   | 32364157          | DMD     | NM_004009    | c.G5477T      | p.R1826I       | TRUE           | -     | 0.0189(E)                             | -              | TRUE           | Becker muscular dystrophy/Cardiomyopathy, dilated, 3B/Duchenne muscular dystrophy | X-linked          | behavior/nervous system       | hemi     |
| 2-1353    | X   | 64719083          | ZC3H12B | NM_001010888 | c.G953A       | p.R318Q        | TRUE           | -     | -                                     | O'Roak: R67H   | FALSE          | -                                                                                 | -                 | -                             | -        |
| 2-1352    | X   | 70386983          | NLGN3   | NM_001166660 | c.G916A       | p.V306M        | TRUE           | -     | -                                     | -              | TRUE           | Asperger syndrome susceptibility/Autism susceptibility                            | X-linked          | behavior/nervous system       | hemi     |
| 2-1375    | X   | 129150017         | BCORL1  | NM_021946    | c.G3269C      | p.R1090P       | TRUE           | -     | -                                     | Sanders: C797Y | FALSE          | -                                                                                 | -                 | -                             | -        |
| 2-1353    | X   | 135795456         | ARHGEF6 | NM_004840    | c.G806T       | p.R269I        | TRUE           | -     | -                                     | -              | TRUE           | Mental retardation                                                                | X-linked          | behavior/nervous system       | hemi     |
| 2-1269    | X   | 148069012         | AFF2    | NM_001170628 | c.G2662A      | p.V888I        | TRUE           | -     | -                                     | -              | TRUE           | Mental retardation                                                                | X-linked          | behavior/nervous system       | hemi     |

<sup>a</sup>Predicted effect of mutation by ANNOVAR. F: frameshift, M: missense, N: nonsense, S: synonymous, SS: splice site

<sup>b</sup>Inheritance state of the mutation. D: de novo, I: inherited

<sup>c</sup>Predicted functional effect by SIFT. D: damaging, T: tolerated

<sup>d</sup>Predicted functional effect by Polyphen-2. B: benign, D: probably deleterious, PD: possibly deleterious

<sup>e</sup>Concluded prediction based on SIFT and Polyphen-2. B: benign, PB: possibly benign (benign based on one tool), PD: possibly deleterious (deleterious based on one tool), D: deleterious, U: undetermined (when SIFT and Polyphen-2 gave opposite prediction)

<sup>f</sup>Predicted functional effect by MutationTaser. DC: disease cause, PP: Polymorphism



**Table S6. Clinical description of individuals carrying rare or *de novo* variant**

| Family/<br>ID                | Variant       | Relation to Proband/<br>Diagnosis                                       | Clinical Details                                                                                                                                                                                                                                                                                                                                                                                                                                                                                                                                                                                                     |
|------------------------------|---------------|-------------------------------------------------------------------------|----------------------------------------------------------------------------------------------------------------------------------------------------------------------------------------------------------------------------------------------------------------------------------------------------------------------------------------------------------------------------------------------------------------------------------------------------------------------------------------------------------------------------------------------------------------------------------------------------------------------|
| <b>Family A<br/>(2-1186)</b> |               |                                                                         |                                                                                                                                                                                                                                                                                                                                                                                                                                                                                                                                                                                                                      |
| -01 (F)                      |               | Mother                                                                  | <b>Language:</b> PPVT-IV (SS=93); <b>Other Medical Info:</b> hypothyroidism, allergies                                                                                                                                                                                                                                                                                                                                                                                                                                                                                                                               |
| -02 (M)                      |               | Father                                                                  | <b>Language:</b> PPVT-IV (SS=99)                                                                                                                                                                                                                                                                                                                                                                                                                                                                                                                                                                                     |
| -03 (M)                      | VIP Y73*      | Proband: <b>Clinical dx:</b> Asperger; <b>ADI &amp; ADOS dx:</b> Autism | <b>IQ:</b> WPPSI-III: verbal IQ=115, performance IQ=95, full scale IQ=102; Leiter-R Brief: IQ=102; Merrill-Palmer: developmental index SS=99 (47 %ile), cognitive SS=111 (77 %ile); <b>Language:</b> OWLS: listening comprehension SS=102, oral expression SS=111, oral composite SS=107; PPVT-IV: SS=104; PLS-4: auditory comprehension SS=135, expressive communication SS=126; <b>Adaptive Behavior:</b> VABS-II: communication SS=89, daily living SS=87, socialization SS=77, motor SS=81, adaptive behavior composite SS=80; <b>Other Medical Info:</b> iron deficient                                         |
| -04 (M)                      | VIP Y73*      | Full sibling                                                            | <b>Language:</b> PPVT-IV: SS=131; <b>Other Medical Info:</b> trouble with bowels; speech delay; clumsy as a preschooler and would not put hands down to stop the fall; <b>Microarray analysis:</b> arr 3q25.32q25.3(159,815,284-160,267,487)x1 maternal inherited                                                                                                                                                                                                                                                                                                                                                    |
| <b>Family B<br/>(2-1305)</b> |               |                                                                         |                                                                                                                                                                                                                                                                                                                                                                                                                                                                                                                                                                                                                      |
| -01 (F)                      |               | Mother                                                                  | <b>IQ:</b> WASI-I: verbal IQ=115, performance IQ=110, full scale IQ=115; <b>Language:</b> PPVT-IV: SS=123                                                                                                                                                                                                                                                                                                                                                                                                                                                                                                            |
| -02 (M)                      |               | Father                                                                  | <b>IQ:</b> WASI-I: verbal IQ=111, performance IQ=124, full scale IQ=119; <b>Language:</b> PPVT-IV: SS=115                                                                                                                                                                                                                                                                                                                                                                                                                                                                                                            |
| -03 (M)                      | CAPRIN1 Q399* | Proband: <b>Clinical dx:</b> Asperger; <b>ADI &amp; ADOS dx:</b> Autism | <b>IQ:</b> WISC-IV: verbal comprehension composite=121, perceptual reasoning composite=129, working memory composite=104, processing speed composite=94, full scale IQ=119; Leiter-R Brief: IQ=98; <b>Language:</b> OWLS: listening comprehension SS=93, oral expression SS=84, oral composite SS=87; PPVT-IV: SS=135; <b>Adaptive Behavior:</b> VABS-II: communication SS=88, daily living SS=76, socialization SS=64, adaptive behavior composite SS=74; <b>Other Medical Info:</b> OCD suspected; had fetal distress and had trouble breathing, was cyanotic and needed oxygen; had some gastrointestinal issues. |
| <b>Family C<br/>(2-1337)</b> |               |                                                                         |                                                                                                                                                                                                                                                                                                                                                                                                                                                                                                                                                                                                                      |
| -01 (F)                      |               | Mother                                                                  | <b>Language:</b> PPVT-IV: SS=105; <b>Other Medical Info:</b> seasonal allergies, hypothyroidism                                                                                                                                                                                                                                                                                                                                                                                                                                                                                                                      |
| -02 (M)                      |               | Father                                                                  | <b>Language:</b> PPVT-IV: SS=98; <b>Other Medical Info:</b> suspected ADHD                                                                                                                                                                                                                                                                                                                                                                                                                                                                                                                                           |

| Family/<br>ID                | Variant                                                              | Relation to Proband/<br>Diagnosis                                                   | Clinical Details                                                                                                                                                                                                                                                                                                                                                                                                                                         |
|------------------------------|----------------------------------------------------------------------|-------------------------------------------------------------------------------------|----------------------------------------------------------------------------------------------------------------------------------------------------------------------------------------------------------------------------------------------------------------------------------------------------------------------------------------------------------------------------------------------------------------------------------------------------------|
| -03 (F)                      | SCN2A 440_450del                                                     | Proband: <b>Clinical dx:</b> Autism; <b>ADI &amp; ADOS dx:</b> Autism               | <b>IQ:</b> Leiter-R Brief: IQ=too low functioning to score; <b>Adaptive Behavior:</b> VABS-II: communication SS=47, daily living SS=69, socialization SS=66, motor SS=64, adaptive behavior composite SS=59; <b>Other Medical Info:</b> reactive asthma when sick                                                                                                                                                                                        |
| <b>Family D<br/>(2-1370)</b> |                                                                      |                                                                                     |                                                                                                                                                                                                                                                                                                                                                                                                                                                          |
| -01 (F)                      |                                                                      | Mother                                                                              | <b>Language:</b> PPVT-IV: SS=113; <b>Other Medical Info:</b> allergies                                                                                                                                                                                                                                                                                                                                                                                   |
| -02 (M)                      |                                                                      | Father                                                                              | <b>Language:</b> PPVT-IV: SS=107                                                                                                                                                                                                                                                                                                                                                                                                                         |
| -03 (M)                      | USP54 S399Efs<br>(KIAA1217 L696P;<br>FAT3 V3978M;<br>STXBP5L p.G21D) | Proband: <b>Clinical dx:</b> Asperger; <b>ADI &amp; ADOS dx:</b> Autism             | <b>IQ:</b> WISC-IV: verbal comprehension composite=96, perceptual reasoning composite=111; Leiter-R Brief: IQ=87; <b>Language:</b> OWLS: listening comprehension SS=101, oral expression SS=104, oral composite SS=102; PPVT-IV: SS=123; <b>Adaptive Behavior:</b> VABS-II: communication SS=92, daily living SS=76, socialization SS=66, adaptive behavior composite SS=76; <b>Other Medical Info:</b> allergies                                        |
| <b>Family E<br/>(2-1303)</b> |                                                                      |                                                                                     |                                                                                                                                                                                                                                                                                                                                                                                                                                                          |
| -01 (F)                      |                                                                      | Mother                                                                              | <b>Language:</b> PPVT-IV: SS=109; <b>Other Medical Info:</b> underactive thyroid                                                                                                                                                                                                                                                                                                                                                                         |
| -02 (M)                      |                                                                      | Father                                                                              | <b>Language:</b> PPVT-IV: SS=107; <b>Other Medical Info:</b> high blood pressure                                                                                                                                                                                                                                                                                                                                                                         |
| -03 (M)                      | KAL1 R423* (LRGUK<br>G232G)                                          | Proband: <b>Clinical dx:</b> Atypical/PDD-NOS/ASD; <b>ADI &amp; ADOS dx:</b> Autism | <b>IQ:</b> WASI-I: verbal IQ=78, performance IQ=96, full scale IQ=86; <b>Language:</b> OWLS: listening comprehension SS=72, oral expression SS=74, oral composite SS=71; PPVT-IV: SS=78; <b>Adaptive Behavior:</b> VABS-II: communication SS=68, daily living SS=72, socialization SS=60, adaptive behavior composite SS=65; <b>Other Medical Info:</b> Kallmann syndrome; has only one kidney; born with micro-penis, mirror movements; Type 1 diabetes |
| <b>Family F<br/>(2-1276)</b> |                                                                      |                                                                                     |                                                                                                                                                                                                                                                                                                                                                                                                                                                          |
| -01 (F)                      |                                                                      | Mother                                                                              | <b>Language:</b> PPVT-IV: SS=120; CELF-4: core language SS=124, %ile rank=95, expressive language SS=120, %ile rank=91; <b>Other Medical Info:</b> seasonal allergies, asthma                                                                                                                                                                                                                                                                            |
| -02 (M)                      |                                                                      | Father                                                                              | <b>Other Medical Info:</b> recovered from Hepatitis C                                                                                                                                                                                                                                                                                                                                                                                                    |
| -03 (F)                      | MICALCL S399Lfs<br>(DNMT3A R635W)                                    | Proband: <b>Clinical dx:</b> Atypical/PDD-NOS/ASD; <b>ADI &amp; ADOS dx:</b> Autism | <b>IQ:</b> Leiter-R Brief: IQ=38; Stanford-Binet: Abbreviated IQ SS=47; <b>Language:</b> PPVT-IV: SS=20; <b>Adaptive Behavior:</b> VABS-II: communication SS=43, daily living SS=40, socialization SS=40, motor SS=56, adaptive behavior composite SS=39; <b>Other info:</b> has 4 other relatives with ASD (cousins)                                                                                                                                    |

| Family/<br>ID                | Variant                                        | Relation to Proband/<br>Diagnosis                                                         | Clinical Details                                                                                                                                                                                                                                                                                                                                                                                                                                                                                                                                                                               |
|------------------------------|------------------------------------------------|-------------------------------------------------------------------------------------------|------------------------------------------------------------------------------------------------------------------------------------------------------------------------------------------------------------------------------------------------------------------------------------------------------------------------------------------------------------------------------------------------------------------------------------------------------------------------------------------------------------------------------------------------------------------------------------------------|
| <b>Family G<br/>(2-1269)</b> |                                                |                                                                                           |                                                                                                                                                                                                                                                                                                                                                                                                                                                                                                                                                                                                |
| -01 (F)                      | <i>AFF2</i> V888I                              | Mother                                                                                    | <b>Language:</b> PPVT-IV: SS=103; <b>Other Medical Info:</b> asthma, hypertension; self-reported dyslexic                                                                                                                                                                                                                                                                                                                                                                                                                                                                                      |
| -02 (M)                      | <i>KCNQ2</i> c.1247+1G>A                       | Father: <b>Clinical dx:</b><br>Asperger                                                   | <b>Language:</b> PPVT-IV: SS=90; <b>Other Medical Info:</b> depression; had seizures as an infant                                                                                                                                                                                                                                                                                                                                                                                                                                                                                              |
| -03 (M)                      | <i>AFF2</i> V888I; <i>KCNQ2</i><br>c.1247+1G>A | Proband: <b>Clinical dx:</b><br>Autism; <b>ADI &amp; ADOS dx:</b><br>Autism               | <b>IQ:</b> Leiter-R Brief: IQ=117; <b>Language:</b> OWLS: listening comprehension SS=79, oral expression SS=59, oral composite SS=67; PPVT-IV: SS=82; <b>Adaptive Behavior:</b> VABS-II: communication SS=78, daily living SS=75, socialization SS=74, motor SS=72, adaptive behavior composite SS=71; <b>Other Medical Conditions:</b> at 3 days developed seizures, meningitis suspected but father also had seizures as an infant, was on phenobarbital for 1 month; <b>Other info:</b> paternal half uncle has male child with ASD; paternal half aunt has female child with severe autism |
| -04 (F)                      | <i>KCNQ2</i> c.1247+1G>A                       | Full sibling                                                                              | <b>Other Medical Info:</b> skull x-ray requested in 2012 because head circumference is smaller than expected                                                                                                                                                                                                                                                                                                                                                                                                                                                                                   |
| -13 (F)                      | <i>AFF2</i> V888I                              | Maternal Grandmother                                                                      |                                                                                                                                                                                                                                                                                                                                                                                                                                                                                                                                                                                                |
| -15 (F)                      | <i>KCNQ2</i> c.1247+1G>A                       | Paternal Grandmother                                                                      |                                                                                                                                                                                                                                                                                                                                                                                                                                                                                                                                                                                                |
| <b>Family H<br/>(2-1353)</b> |                                                |                                                                                           |                                                                                                                                                                                                                                                                                                                                                                                                                                                                                                                                                                                                |
| -01 (F)                      | <i>ARHGEF6</i> R269I;<br><i>ZC3H12B</i> R318Q  | Mother                                                                                    | <b>Language:</b> PPVT-IV: SS=115; <b>Other Medical Info:</b> allergies to bees and aspirin                                                                                                                                                                                                                                                                                                                                                                                                                                                                                                     |
| -02 (M)                      |                                                | Father                                                                                    | <b>Language:</b> PPVT-IV: SS=88 (ESL); <b>Other Medical Info:</b> allergies                                                                                                                                                                                                                                                                                                                                                                                                                                                                                                                    |
| -03 (M)                      | <i>ARHGEF6</i> R269I;<br><i>ZC3H12B</i> R318Q  | Proband: <b>Clinical dx:</b><br>Atypical/PDD-NOS/ASD;<br><b>ADI &amp; ADOS dx:</b> Autism | <b>IQ:</b> Leiter-R Brief: IQ=70; <b>Adaptive Behavior:</b> VABS-II: communication SS=64, daily living SS=69, socialization SS=59, adaptive behavior composite SS=64;                                                                                                                                                                                                                                                                                                                                                                                                                          |
| -04 (F)                      | <i>ARHGEF6</i> R269I;<br><i>ZC3H12B</i> R318Q  | full sibling of proband                                                                   | <b>Language:</b> PPVT-IV: SS=99                                                                                                                                                                                                                                                                                                                                                                                                                                                                                                                                                                |

| Family/<br>ID                | Variant                                                                                  | Relation to Proband/<br>Diagnosis                                                         | Clinical Details                                                                                                                                                                                                                                                                                                                                                                                                                                                                                   |
|------------------------------|------------------------------------------------------------------------------------------|-------------------------------------------------------------------------------------------|----------------------------------------------------------------------------------------------------------------------------------------------------------------------------------------------------------------------------------------------------------------------------------------------------------------------------------------------------------------------------------------------------------------------------------------------------------------------------------------------------|
| <b>Family I<br/>(2-1330)</b> |                                                                                          |                                                                                           |                                                                                                                                                                                                                                                                                                                                                                                                                                                                                                    |
| -01 (F)                      | <i>DMD</i> R1826I                                                                        | Mother                                                                                    | <b>Language:</b> PPVT-IV: SS=100                                                                                                                                                                                                                                                                                                                                                                                                                                                                   |
| -02 (M)                      |                                                                                          | Father                                                                                    | <b>Language:</b> PPVT-IV: SS=109; <b>Other Medical info:</b> recovered from brain tumour 3 years ago, kidney stones                                                                                                                                                                                                                                                                                                                                                                                |
| -03 (M)                      | <i>DMD</i> R1826I ( <i>WWC3</i><br>R940Q)                                                | Proband: <b>Clinical dx:</b><br>Asperger; <b>ADI &amp; ADOS dx:</b><br>Autism             | <b>IQ:</b> WASI-I: verbal IQ=95, performance IQ=93, full scale IQ=93; <b>Language:</b> OWLS: listening comprehension SS=86, oral expression SS=94, oral composite SS=89; PPVT-IV: SS=91; <b>Adaptive Behavior:</b> VABS-II: communication SS=96, daily living SS=85, socialization SS=89, adaptive behavior composite SS=88                                                                                                                                                                        |
| -05 (F)                      | <i>DMD</i> R1826I                                                                        | Maternal Grandmother                                                                      |                                                                                                                                                                                                                                                                                                                                                                                                                                                                                                    |
| <b>Family J<br/>(2-1375)</b> |                                                                                          |                                                                                           |                                                                                                                                                                                                                                                                                                                                                                                                                                                                                                    |
| -01 (F)                      | <i>BCORL1</i> R1090P                                                                     | Mother                                                                                    | <b>Language:</b> PPVT-IV: SS=100                                                                                                                                                                                                                                                                                                                                                                                                                                                                   |
| -02 (M)                      |                                                                                          | Father                                                                                    | <b>Language:</b> PPVT-IV: SS=118                                                                                                                                                                                                                                                                                                                                                                                                                                                                   |
| -03 (M)                      | <i>BCORL1</i> R1090P                                                                     | Proband: <b>Clinical dx:</b><br>Atypical/PDD-NOS/ASD;<br><b>ADI &amp; ADOS dx:</b> Autism | <b>IQ:</b> WASI-I: verbal IQ=125, performance IQ=112, full scale IQ=121; <b>Language:</b> OWLS: listening comprehension SS=111, oral expression SS=102, oral composite SS=107; PPVT-IV: SS=119; <b>Adaptive Behavior:</b> VABS-II: communication SS=79, daily living SS=87, socialization SS=71, adaptive behavior composite SS=77                                                                                                                                                                 |
| -05 (F)                      | <i>BCORL1</i> R1090P                                                                     | Full Sibling                                                                              |                                                                                                                                                                                                                                                                                                                                                                                                                                                                                                    |
| <b>Family K<br/>(2-1272)</b> |                                                                                          |                                                                                           |                                                                                                                                                                                                                                                                                                                                                                                                                                                                                                    |
| -01 (F)                      |                                                                                          | Mother                                                                                    | <b>Language:</b> PPVT-IV: SS=106; <b>Other Medical Info:</b> lactose intolerant                                                                                                                                                                                                                                                                                                                                                                                                                    |
| -02 (M)                      | <i>CHD7</i> R1189H                                                                       | Father                                                                                    | <b>Language:</b> PPVT-IV: SS=115                                                                                                                                                                                                                                                                                                                                                                                                                                                                   |
| -03 (M)                      | <i>CHD7</i> R1189H<br>( <i>MOV10</i> R356Q;<br><i>MAP4</i> M622V; <i>SLIT3</i><br>G742G) | Proband: <b>Clinical dx:</b><br>Asperger; <b>ADI &amp; ADOS dx:</b><br>Autism             | <b>IQ:</b> WPPSI-III: verbal IQ=118, performance IQ=108, full scale IQ=113; <b>Language:</b> OWLS: listening comprehension SS=103, oral expression SS=104, oral composite SS=103; PPVT-IV: SS=100; <b>Adaptive Behavior:</b> VABS-II: communication SS=100, daily living SS=93, socialization SS=70, motor SS=94, adaptive behavior composite SS=87; <b>Other Medical Info:</b> recurrent ear infections, tonsils and adenoids removed, had sleep apnea; eats and sleeps well but still low energy |

| Family/<br>ID                | Variant                         | Relation to Proband/<br>Diagnosis                                             | Clinical Details                                                                                                                                                                                                                                                                                                                                                                                                                   |
|------------------------------|---------------------------------|-------------------------------------------------------------------------------|------------------------------------------------------------------------------------------------------------------------------------------------------------------------------------------------------------------------------------------------------------------------------------------------------------------------------------------------------------------------------------------------------------------------------------|
| <b>Family L<br/>(2-1291)</b> |                                 |                                                                               |                                                                                                                                                                                                                                                                                                                                                                                                                                    |
| -01 (F)                      | SCN2A R28C                      | Mother                                                                        | <b>Language:</b> PPVT-IV: SS=101; <b>Other Info:</b> procrastinates, worries                                                                                                                                                                                                                                                                                                                                                       |
| -02 (M)                      |                                 | Father                                                                        | <b>Language:</b> PPVT-IV: SS=118; <b>Other Medical Info:</b> severe arthritis came on in his early teens, some learning difficulties                                                                                                                                                                                                                                                                                               |
| -03 (M)                      | SCN2A R28C<br>(KIAA0284 R1122H) | Proband: <b>Clinical dx:</b><br>Asperger; <b>ADI &amp; ADOS dx:</b><br>Autism | <b>IQ:</b> WISC-IV: verbal comprehension composite=98, perceptual reasoning composite=107, working memory composite=97, processing speed composite=75, full scale IQ=93;<br><b>Language:</b> OWLS: listening comprehension SS=87, oral expression SS=92, oral composite SS=88; PPVT-IV: SS=111; <b>Adaptive Behavior:</b> VABS-II: communication SS=79, daily living SS=78, socialization SS=69, adaptive behavior composite SS=74 |
| -04 (F)                      | SCN2A R28C                      | Full Sibling                                                                  | <b>Other Medical Info:</b> born with urinary reflux -microplasty both ureters at age 6;; poor at reading social cues, relates better to adults, mother questions ASD                                                                                                                                                                                                                                                               |
| -05 (F)                      | SCN2A R28C                      | Full Sibling                                                                  | <b>Language:</b> PPVT-IV: SS=111; <b>Other Medical Info:</b> heart murmur; <b>Other Info:</b> procrastinator, time management hard                                                                                                                                                                                                                                                                                                 |
| -06 (F)                      | SCN2A R28C                      | Maternal Grandmother                                                          |                                                                                                                                                                                                                                                                                                                                                                                                                                    |
| <b>Family M<br/>(2-1116)</b> |                                 |                                                                               |                                                                                                                                                                                                                                                                                                                                                                                                                                    |
| -01 (F)                      |                                 | Mother                                                                        | <b>Language:</b> PPVT-IV: SS=98; EVT-2: SS=115; <b>Other Medical Info:</b> allergies, eczema, alopecia (no body hair)                                                                                                                                                                                                                                                                                                              |
| -02 (M)                      | NRXN1 H885Y                     | Father                                                                        | <b>Language:</b> PPVT-IV: SS=103; EVT-2: SS=112                                                                                                                                                                                                                                                                                                                                                                                    |
| -03 (M)                      | NRXN1 H885Y<br>(ARID5A G120V)   | Proband: <b>Clinical dx:</b><br>Autism; <b>ADI &amp; ADOS dx:</b><br>Autism   | <b>IQ:</b> Leiter-R Brief: IQ=89; <b>Language:</b> OWLS: listening comprehension SS=61, oral expression SS=58, oral composite SS=57; <b>Adaptive Behavior:</b> VABS-II: communication SS=67, daily living SS=66, socialization SS=61, adaptive behavior composite SS=64; <b>Other Medical Info:</b> eczema; one incident of no body hair - triggered by stress                                                                     |
| -04 (M)                      | NRXN1 H885Y                     | Full Sibling                                                                  | <b>Language:</b> OWLS: listening comprehension SS=117, oral expression SS=110, oral composite SS=114; <b>Other Medical Info:</b> eczema; infant asthma, learning disability- Central Auditory Processing Disorder (CAPD)                                                                                                                                                                                                           |
| <b>Family N<br/>(2-1244)</b> |                                 |                                                                               |                                                                                                                                                                                                                                                                                                                                                                                                                                    |
| -01 (F)                      |                                 | Mother                                                                        | <b>Language:</b> PPVT-IV: SS=123; <b>Other Medical Info:</b> epilepsy                                                                                                                                                                                                                                                                                                                                                              |
| -02 (M)                      | CACNA1C R1522Q                  | Father                                                                        | <b>Language:</b> PPVT-IV: SS=115; <b>Other Medical Info:</b> Wolff-Parkinson-White syndrome                                                                                                                                                                                                                                                                                                                                        |

| Family/<br>ID                | Variant                                                                               | Relation to Proband/<br>Diagnosis                                                      | Clinical Details                                                                                                                                                                                                                                                                                                                                                                                                                                                                                   |
|------------------------------|---------------------------------------------------------------------------------------|----------------------------------------------------------------------------------------|----------------------------------------------------------------------------------------------------------------------------------------------------------------------------------------------------------------------------------------------------------------------------------------------------------------------------------------------------------------------------------------------------------------------------------------------------------------------------------------------------|
| -03 (M)                      | <i>CACNA1C</i> R1522Q                                                                 | Proband: <b>Clinical dx:</b> Atypical/PDD-NOS/ASD;<br><b>ADI &amp; ADOS dx:</b> Autism | <b>IQ:</b> WISC-IV: verbal comprehension composite=102, perceptual reasoning composite=107, working memory composite=111, processing speed composite=85, full scale IQ=101;<br><b>Language:</b> OWLS: listening comprehension SS=66, oral expression SS=93, oral composite SS=78; PPVT-IV: SS=113; <b>Adaptive Behavior:</b> VABS-II: communication SS=88, daily living SS=103, socialization SS=91, adaptive behavior composite SS=92; <b>Other Medical Info:</b> ADHD, migraines, peanut allergy |
| -04 (M)                      | <i>CACNA1C</i> R1522Q                                                                 | Full Sibling                                                                           | <b>Language:</b> PPVT-IV: SS=111; <b>Other Medical Info:</b> milk allergy                                                                                                                                                                                                                                                                                                                                                                                                                          |
| <b>Family O<br/>(2-1352)</b> |                                                                                       |                                                                                        |                                                                                                                                                                                                                                                                                                                                                                                                                                                                                                    |
| -01 (F)                      | <i>NLGN3</i> V306M;<br><i>EHMT1</i> P1099A                                            | Mother                                                                                 | <b>Language:</b> PPVT-IV: SS=93; <b>Other Medical Info:</b> allergy-induced asthma                                                                                                                                                                                                                                                                                                                                                                                                                 |
| -02 (M)                      |                                                                                       | Father                                                                                 | <b>Language:</b> PPVT-IV: SS=100; <b>Other Medical Info:</b> mitrovalve prolapse                                                                                                                                                                                                                                                                                                                                                                                                                   |
| -03 (M)                      | <i>NLGN3</i> V306M;<br><i>EHMT1</i> P1099A ( <i>SNX5</i><br>K365R; <i>SOX7</i> P241P) | Proband: <b>Clinical dx:</b> Asperger; <b>ADI &amp; ADOS dx:</b> Autism                | <b>IQ:</b> WASI-I: verbal IQ=119, performance IQ=114, full scale IQ=119; <b>Language:</b> OWLS: listening comprehension SS=97, oral expression SS=105, oral composite SS=101; PPVT-IV: SS=105; <b>Adaptive Behavior:</b> VABS-II: communication SS=104, daily living SS=97, socialization SS=76, adaptive behavior composite SS=90                                                                                                                                                                 |
| -04 (F)                      | <i>NLGN3</i> V306M                                                                    | Full Sibling                                                                           | <b>Language:</b> PPVT-IV: SS=114                                                                                                                                                                                                                                                                                                                                                                                                                                                                   |
| -05 (F)                      | <i>EHMT1</i> P1099A                                                                   | Maternal Grandmother                                                                   |                                                                                                                                                                                                                                                                                                                                                                                                                                                                                                    |
| <b>Family P<br/>(2-1334)</b> |                                                                                       |                                                                                        |                                                                                                                                                                                                                                                                                                                                                                                                                                                                                                    |
| -01 (F)                      |                                                                                       | Mother                                                                                 | <b>Language:</b> PPVT-IV: SS=97                                                                                                                                                                                                                                                                                                                                                                                                                                                                    |
| -02 (M)                      | <i>SATB2</i> P655S                                                                    | Father                                                                                 | <b>Language:</b> PPVT-IV: SS=98                                                                                                                                                                                                                                                                                                                                                                                                                                                                    |
| -03 (M)                      | <i>SATB2</i> P655S                                                                    | Proband: <b>Clinical dx:</b> Autism; <b>ADI &amp; ADOS dx:</b> Autism                  | <b>IQ:</b> Leiter-R Brief: IQ=62; <b>Adaptive Behavior:</b> VABS-II: communication SS=61, daily living SS=64, socialization SS=63, motor SS=61, adaptive behavior composite SS=59;                                                                                                                                                                                                                                                                                                                 |
| -06 (M)                      | <i>SATB2</i> P655S                                                                    | Paternal Grandfather                                                                   |                                                                                                                                                                                                                                                                                                                                                                                                                                                                                                    |
| <b>2-1342</b>                |                                                                                       |                                                                                        |                                                                                                                                                                                                                                                                                                                                                                                                                                                                                                    |
| -01 (F)                      |                                                                                       | Mother: <b>Clinical dx:</b> Asperger                                                   | <b>IQ:</b> WISC-R: verbal IQ=124, performance IQ=131, full scale IQ=131; <b>Language:</b> PPVT-IV: SS=123; <b>Other Medical Info:</b> depression                                                                                                                                                                                                                                                                                                                                                   |
| -02 (M)                      |                                                                                       | Father: <b>Clinical dx:</b>                                                            | <b>Language:</b> PPVT-IV: SS=107; <b>Other Medical Information:</b> diabetes (could be a metabolic                                                                                                                                                                                                                                                                                                                                                                                                 |

| Family/<br>ID                 | Variant                                    | Relation to Proband/<br>Diagnosis                                                                 | Clinical Details                                                                                                                                                                                                                                                                                                                                                                                                                                                                                                                                          |
|-------------------------------|--------------------------------------------|---------------------------------------------------------------------------------------------------|-----------------------------------------------------------------------------------------------------------------------------------------------------------------------------------------------------------------------------------------------------------------------------------------------------------------------------------------------------------------------------------------------------------------------------------------------------------------------------------------------------------------------------------------------------------|
| -03 (F)                       | <i>CLCNKB</i> I136M                        | Asperger<br>Proband: <b>Clinical dx:</b><br>Asperger; <b>ADI &amp; ADOS dx:</b><br>Autism         | syndrome), takes insulin injection<br><b>IQ:</b> WASI-I: verbal IQ=114, performance IQ=128, full scale IQ=124; <b>Language:</b> OWLS: listening comprehension SS=96, oral expression SS=86, oral composite SS=90; PPVT-IV: SS=129; <b>Adaptive Behavior:</b> VABS-II: communication SS=94, daily living SS=76, socialization SS=64, adaptive behavior composite SS=76                                                                                                                                                                                     |
| <b>2-1182</b>                 |                                            |                                                                                                   |                                                                                                                                                                                                                                                                                                                                                                                                                                                                                                                                                           |
| -01 (F)<br>-02 (M)<br>-03 (M) | <i>AHRR</i> Q169E                          | Mother<br>Father<br>Proband: <b>Clinical dx:</b><br>Autism; <b>ADI &amp; ADOS dx:</b><br>Autism   | <b>IQ:</b> Leiter-R Brief: IQ=105; <b>Language:</b> OWLS: listening comprehension SS=85, oral expression SS=101, oral composite SS=92; <b>Adaptive Behavior:</b> VABS-II: communication SS=97, daily living SS=85, socialization SS=85, motor SS=94, adaptive behavior composite SS=88; <b>Other Info:</b> maternal aunt has male child with ASD                                                                                                                                                                                                          |
| <b>2-1379</b>                 |                                            |                                                                                                   |                                                                                                                                                                                                                                                                                                                                                                                                                                                                                                                                                           |
| -01 (F)<br>-02 (M)<br>-03 (M) | <i>ARL6IP6</i> C73G                        | Mother<br>Father<br>Proband: <b>ADI &amp; ADOS dx:</b><br>Autism                                  | <b>Language:</b> PPVT-IV: SS=113<br><b>Language:</b> PPVT-IV: SS=95<br><b>IQ/Language:</b> Mullen: visual reception T-score=20, fine motor T-score=<20, receptive language T-score=<20, expressive language T-score=24, early learning composite SS=50; <b>Adaptive Behavior:</b> VABS-II: communication SS=69, daily living SS=77, socialization SS=72, motor SS=67, adaptive behavior composite SS=68                                                                                                                                                   |
| <b>2-1266</b>                 |                                            |                                                                                                   |                                                                                                                                                                                                                                                                                                                                                                                                                                                                                                                                                           |
| -01 (F)<br>-02 (M)<br>-03 (F) | <i>TBC1D30</i> A654V;<br><i>NROB1</i> A87S | Mother<br>Father<br>Proband: <b>Clinical dx:</b><br>Asperger; <b>ADI &amp; ADOS dx:</b><br>Autism | <b>Language:</b> PPVT-IV: SS=100; <b>Other Medical Info:</b> underactive thyroid, ulcers<br><b>Language:</b> PPVT-IV: SS=120; <b>Other Medical Info:</b> hereditary tremor (father and brothers also have same condition)<br><b>IQ:</b> WASI-I: verbal IQ=93, performance IQ=103, full scale IQ=98; <b>Language:</b> OWLS: listening comprehension SS=81, oral expression SS=86, oral composite SS=82; PPVT-IV: SS=94; <b>Adaptive Behavior:</b> VABS-II: communication SS=81, daily living SS=83, socialization SS=73, adaptive behavior composite SS=77 |
| <b>2-1314</b>                 |                                            |                                                                                                   |                                                                                                                                                                                                                                                                                                                                                                                                                                                                                                                                                           |
| -01 (F)<br>-02 (M)            |                                            | Mother<br>Father                                                                                  | <b>Language:</b> PPVT-IV: SS=125<br><b>Language:</b> PPVT-IV: SS=123                                                                                                                                                                                                                                                                                                                                                                                                                                                                                      |

| Family/<br>ID | Variant                                     | Relation to Proband/<br>Diagnosis                                                                         | Clinical Details                                                                                                                                                                                                                                                                                                                            |
|---------------|---------------------------------------------|-----------------------------------------------------------------------------------------------------------|---------------------------------------------------------------------------------------------------------------------------------------------------------------------------------------------------------------------------------------------------------------------------------------------------------------------------------------------|
| -03 (M)       | <i>HCAR1</i> L318L                          | Proband: <b>Clinical dx:</b> Autism; <b>ADI &amp; ADOS dx:</b> Autism                                     | <b>IQ:</b> Leiter-R Brief: IQ=68; <b>Language:</b> OWLS: listening comprehension SS=45, oral expression SS=50, oral composite SS=45; PPVT-IV: SS=64; <b>Adaptive Behavior:</b> VABS-II: communication SS=79, daily living SS=81, socialization SS=75, motor SS=72, adaptive behavior composite SS=73                                        |
| <b>2-1268</b> |                                             |                                                                                                           |                                                                                                                                                                                                                                                                                                                                             |
| -01 (F)       |                                             | Mother                                                                                                    | <b>Other Medical Info:</b> depression, learning disability, auditory processing problems                                                                                                                                                                                                                                                    |
| -02 (M)       |                                             | Father                                                                                                    | <b>Other Medical Info:</b> depression, speech delay                                                                                                                                                                                                                                                                                         |
| -03 (M)       |                                             | Proband: <b>Clinical dx:</b> Atypical/PDD-NOS/ASD; <b>ADI &amp; ADOS dx:</b> Autism                       | <b>IQ/Language:</b> Mullen: visual reception T-score=20, fine motor T-score=20, receptive language T-score=<20, expressive language T-score=<20, early learning composite SS=49; <b>Adaptive Behavior:</b> VABS-II: communication SS=65, daily living SS=85, socialization SS=72, motor SS=72, adaptive behavior composite SS=70            |
| <b>2-1239</b> |                                             |                                                                                                           |                                                                                                                                                                                                                                                                                                                                             |
| -01 (F)       |                                             | Mother                                                                                                    | <b>Language:</b> PPVT-IV: SS=99; <b>Other Medical Info:</b> hypoglycemic                                                                                                                                                                                                                                                                    |
| -02 (M)       |                                             | Father                                                                                                    |                                                                                                                                                                                                                                                                                                                                             |
| -03 (F)       | <i>INPP5K</i> G139S;<br><i>IMPDH2</i> L185F | Proband: <b>Clinical dx:</b> Autism; <b>ADI &amp; ADOS dx:</b> Autism                                     | <b>IQ:</b> Leiter-R Brief: IQ=36; <b>Language:</b> OWLS: listening comprehension SS=40, oral expression SS=40, oral composite SS=40; PPVT-IV: SS=20; <b>Adaptive Behavior:</b> VABS-II: communication SS=47, daily living SS=56, socialization SS=43, adaptive behavior composite SS=48                                                     |
| <b>2-1280</b> |                                             |                                                                                                           |                                                                                                                                                                                                                                                                                                                                             |
| -01 (F)       |                                             | Mother                                                                                                    | <b>Language:</b> PPVT-IV: SS= 73 (ESL)                                                                                                                                                                                                                                                                                                      |
| -02 (M)       |                                             | Father                                                                                                    | <b>Language:</b> PPVT-IV: SS=76 (ESL)                                                                                                                                                                                                                                                                                                       |
| -03 (F)       | <i>MXRA5</i> N137S                          | Proband: <b>Clinical dx:</b> Atypical/PDD-NOS/ASD; <b>ADI dx:</b> Autism; <b>ADOS dx:</b> Autism Spectrum | <b>IQ:</b> WASI-I: verbal IQ=110, performance IQ=97, full scale IQ=105; <b>Language:</b> OWLS: listening comprehension SS=94, oral expression SS=85, oral composite SS=88; PPVT-IV: SS=101; <b>Adaptive Behavior:</b> VABS-II: communication SS=79, daily living SS=75, socialization SS=68, motor SS=88, adaptive behavior composite SS=74 |
| <b>2-1368</b> |                                             |                                                                                                           |                                                                                                                                                                                                                                                                                                                                             |
| -01 (F)       |                                             | Mother                                                                                                    | <b>Language:</b> PPVT-IV: SS=107                                                                                                                                                                                                                                                                                                            |
| -02 (M)       |                                             | Father                                                                                                    | <b>Language:</b> PPVT-IV: SS=99                                                                                                                                                                                                                                                                                                             |



| Family/<br>ID | Variant                                     | Relation to Proband/<br>Diagnosis                                           | Clinical Details                                                                                                                                                                                                                                                                                                                                                                                        |
|---------------|---------------------------------------------|-----------------------------------------------------------------------------|---------------------------------------------------------------------------------------------------------------------------------------------------------------------------------------------------------------------------------------------------------------------------------------------------------------------------------------------------------------------------------------------------------|
| -03 (F)       | <i>COPS2</i> P300L; <i>COL7A1</i><br>R1366W | Proband: <b>Clinical dx:</b><br>Autism; <b>ADI &amp; ADOS dx:</b><br>Autism | <b>IQ:</b> WASI-I: verbal IQ=102, performance IQ=112, full scale IQ=108; <b>Language:</b> OWLS: listening comprehension SS=80, oral expression SS=96, oral composite SS=87; PPVT-IV: SS=89; <b>Adaptive Behavior:</b> VABS-II: communication SS=74, daily living SS=71, socialization SS=59, adaptive behavior composite SS=66; <b>Other Medical Info:</b> stomach issues; <b>Other info:</b> GFCF diet |
| <b>2-0704</b> |                                             |                                                                             |                                                                                                                                                                                                                                                                                                                                                                                                         |
| -01 (F)       |                                             | Mother                                                                      |                                                                                                                                                                                                                                                                                                                                                                                                         |
| -02 (M)       |                                             | Father                                                                      |                                                                                                                                                                                                                                                                                                                                                                                                         |
| -03 (M)       | <i>DCAKD</i> C235A                          | Proband: <b>ADI &amp; ADOS dx:</b><br>Autism                                | <b>IQ:</b> Leiter-R Brief: IQ=40; <b>Language:</b> OWLS: listening comprehension SS=40, oral expression SS=40, oral composite SS=40; <b>Adaptive Behavior:</b> VABS 1984: communication SS=19, daily living SS=19, socialization SS=21, adaptive behavior composite SS=19; <b>Other Info:</b> Father's cousin has male child with ASD                                                                   |
| <b>2-1295</b> |                                             |                                                                             |                                                                                                                                                                                                                                                                                                                                                                                                         |
| -01 (F)       |                                             | Mother                                                                      | <b>IQ:</b> WASI-I: verbal IQ=104, performance IQ=114, full scale IQ=109; <b>Language:</b> PPVT-IV: SS=92 (ESL)                                                                                                                                                                                                                                                                                          |
| -02 (M)       |                                             | Father                                                                      | <b>Language:</b> PPVT-IV: SS=85 (ESL); <b>Other Info:</b> parents are 2nd cousins; has twin brothers both dx with Schizophrenia                                                                                                                                                                                                                                                                         |
| -03 (M)       | <i>SLK</i> R899C; <i>LRRC4</i><br>L80V      | Proband: <b>Clinical dx:</b><br>Autism; <b>ADI &amp; ADOS dx:</b><br>Autism | <b>IQ:</b> WPPSI-III: verbal IQ=76, performance IQ=93, full scale IQ=82; <b>Language:</b> OWLS: listening comprehension SS=75, oral expression SS=82, oral composite SS=77; PPVT-IV: SS=85; <b>Adaptive Behavior:</b> VABS-II: communication SS=87, daily living SS=97, socialization SS=83, motor SS=88, adaptive behavior composite SS=86                                                             |
| <b>2-1325</b> |                                             |                                                                             |                                                                                                                                                                                                                                                                                                                                                                                                         |
| -01 (F)       |                                             | Mother                                                                      | <b>Language:</b> PPVT-IV: SS=129; <b>Other Medical Info:</b> Crohn's Disease; exercised induced asthma                                                                                                                                                                                                                                                                                                  |
| -02 (M)       |                                             | Father                                                                      | <b>Language:</b> PPVT-IV: SS=128                                                                                                                                                                                                                                                                                                                                                                        |
| -03 (M)       |                                             | Proband: <b>Clinical dx:</b><br>Autism; <b>ADI &amp; ADOS dx:</b><br>Autism | <b>IQ:</b> WPPSI-III: verbal IQ=117, performance IQ=129, full scale IQ=130; <b>Language:</b> PLS-4: auditory comprehension SS=129, expressive communication SS=136, total language SS=135; PPVT-IV: SS=130; <b>Adaptive Behavior:</b> VABS-II: communication SS=106, daily living SS=111, socialization SS=88, motor SS=104, adaptive behavior composite SS=102                                         |
| <b>2-1329</b> |                                             |                                                                             |                                                                                                                                                                                                                                                                                                                                                                                                         |
| -01 (F)       | <i>SOS1</i> E533K                           | Mother                                                                      | <b>Language:</b> PPVT-IV: SS=122; <b>Other Medical Info:</b> fibromyalgia, chemical sensitivities, migraines, interstitial bladder disease                                                                                                                                                                                                                                                              |

| Family/<br>ID | Variant                                                                         | Relation to Proband/<br>Diagnosis                                                   | Clinical Details                                                                                                                                                                                                                                                                                                                                                                                                                                                                                                                                                     |
|---------------|---------------------------------------------------------------------------------|-------------------------------------------------------------------------------------|----------------------------------------------------------------------------------------------------------------------------------------------------------------------------------------------------------------------------------------------------------------------------------------------------------------------------------------------------------------------------------------------------------------------------------------------------------------------------------------------------------------------------------------------------------------------|
| -02 (M)       |                                                                                 | Father                                                                              | <b>Language:</b> PPVT-IV: SS=120; <b>Other Medical Info:</b> depression, anxiety, OCD, takes prozac, dyslexic                                                                                                                                                                                                                                                                                                                                                                                                                                                        |
| -03 (M)       | <i>SOS1</i> E533K; <i>CCDC19</i> A434T; <i>SFTPD</i> P107S                      | Proband: <b>Clinical dx:</b> Autism; <b>ADI &amp; ADOS dx:</b> Autism               | <b>IQ:</b> WASI-I: verbal IQ=55, performance IQ=84, full scale IQ=69; <b>Language:</b> OWLS: listening comprehension SS=50, oral expression SS=40, oral composite SS=43; PPVT-IV: SS=57; <b>Adaptive Behavior:</b> VABS-II: communication SS=61, daily living SS=65, socialization SS=61, adaptive behavior composite SS=61; <b>Other Medical Info:</b> exercise-induced asthma, allergies; eczema; occasionally takes prozac for OCD traits; <b>Other Info:</b> GFCF diet                                                                                           |
| <b>2-1360</b> |                                                                                 |                                                                                     |                                                                                                                                                                                                                                                                                                                                                                                                                                                                                                                                                                      |
| -01 (F)       |                                                                                 | Mother                                                                              | <b>Language:</b> PPVT-IV: SS=99; <b>Other Medical Info:</b> age 18 had accident - blind in one eye and deaf in one ear, acquired brain injury, functioning fine; allergic to sulfa                                                                                                                                                                                                                                                                                                                                                                                   |
| -02 (M)       |                                                                                 | Father                                                                              | <b>Language:</b> PPVT-IV: SS=90; <b>Other Medical Info:</b> born with right hand amputation and umbilical cord wrapped around arm; hay fever, skin allergies                                                                                                                                                                                                                                                                                                                                                                                                         |
| -03 (M)       | <i>ZFPL1</i> V29I                                                               | Proband: <b>Clinical dx:</b> Atypical/PDD-NOS/ASD; <b>ADI &amp; ADOS dx:</b> Autism | <b>IQ:</b> WASI-I: verbal IQ=89, performance IQ=94, full scale IQ=90; <b>Language:</b> OWLS: listening comprehension SS=99, oral expression SS=77, oral composite SS=87; PPVT-IV: SS=99; <b>Adaptive Behavior:</b> VABS-II: communication SS=69, daily living SS=71, socialization SS=66, adaptive behavior composite SS=67                                                                                                                                                                                                                                          |
| <b>2-1363</b> |                                                                                 |                                                                                     |                                                                                                                                                                                                                                                                                                                                                                                                                                                                                                                                                                      |
| -01 (F)       |                                                                                 | Mother                                                                              | <b>IQ:</b> WASI-I: verbal IQ=98, performance IQ=116, full scale IQ=107; <b>Language:</b> PPVT-IV: SS=95                                                                                                                                                                                                                                                                                                                                                                                                                                                              |
| -02 (M)       |                                                                                 | Father                                                                              | <b>Language:</b> PPVT-IV: SS=108; <b>Other Medical Info:</b> may have depression                                                                                                                                                                                                                                                                                                                                                                                                                                                                                     |
| -03 (M)       | <i>NAV1</i> R302S; <i>MICAL3</i> H156R; <i>DCAF13</i> C342G; <i>LAMC3</i> R784Q | Proband: <b>Clinical dx:</b> Atypical/PDD-NOS/ASD; <b>ADI &amp; ADOS dx:</b> Autism | <b>IQ:</b> WASI-I: verbal IQ=109, performance IQ=103, full scale IQ=107; <b>Language:</b> OWLS: listening comprehension SS=102, oral expression SS=88, oral composite SS=94; PPVT-IV: SS=111; <b>Adaptive Behavior:</b> VABS-II: communication SS=100, daily living SS=87, socialization SS=75, motor=94, adaptive behavior composite SS=86; <b>Other Medical Info:</b> emergency C-section, birth wt 11 lbs, 4.1 oz, unable to breath normally at birth, required O2, dehydrated and had malnutrition for 3 days after birth,occasionally would turn blue, jaundice |
| <b>2-1369</b> |                                                                                 |                                                                                     |                                                                                                                                                                                                                                                                                                                                                                                                                                                                                                                                                                      |
| -01 (F)       |                                                                                 | Mother                                                                              | <b>Language:</b> PPVT-IV: SS=106; <b>Other Medical Info:</b> OCD (lose does medication), used to have high blood pressure                                                                                                                                                                                                                                                                                                                                                                                                                                            |
| -02 (M)       |                                                                                 | Father                                                                              | <b>Language:</b> PPVT-IV: SS=115; <b>Other Medical Info:</b> medication for cholesterol                                                                                                                                                                                                                                                                                                                                                                                                                                                                              |

| Family/<br>ID | Variant      | Relation to Proband/<br>Diagnosis                                                                      | Clinical Details                                                                                                                                                                                                                                                                                                                                                             |
|---------------|--------------|--------------------------------------------------------------------------------------------------------|------------------------------------------------------------------------------------------------------------------------------------------------------------------------------------------------------------------------------------------------------------------------------------------------------------------------------------------------------------------------------|
| -03 (M)       | SYNE1 P1077S | Proband: <b>Clinical dx:</b><br>Asperger; <b>ADI dx:</b> Autism;<br><b>ADOS dx:</b> Autism<br>Spectrum | <b>IQ:</b> WASI-I: verbal IQ=108, performance IQ=136, full scale IQ=124; <b>Language:</b> OWLS:<br>listening comprehension SS=127, oral expression SS=105, oral composite SS=117; PPVT-IV:<br>SS=121; <b>Adaptive Behavior:</b> VABS-II: communication SS=69, daily living SS=71,<br>socialization SS=57, adaptive behavior composite SS=64; <b>Other Medical Info:</b> ADHD |

F = Female; M = Male; dx = diagnosis

All test scores are presented in percentiles using the following classifications Above Average (75th->99th %), Average (73rd -25th %), Below Average (24th-2nd%), Mild Delay (2-0.1%) Moderate Delay (0.1%) and Severe Delay(<0.1%).

IQ was measured with an age-appropriate Weschler Scale (WPPSI, WISC, WASI) or Leiter-R Brief. Score are presented in percentiles for Full Scale IQ (FSIQ), Verbal IQ (VIQ), Nonverbal IQ (NVIQ).

Language was measures with the Oral and Written Language Scales (OWLS) percentiles scores are presented for Total Language(TL), Receptive Language (RL), Expressive Language (EL). Receptive Vocabulary (RV) was assessed using the Peabody Picture Vocabulary Test (PPVT-4th Edition).

Adaptive Behaviour was measured using the Vineland Adaptive Behaviour Scales- Second Edition (VABS-II). Percentiles are presented for Adaptive Behaviour Composite (ABC), communication (COM), Daily Living Skills (DLS), Socialization (SOC), and Motor (MOT;only for children under 7 years).

**Table S7. Diagnostic data and management implication for families with ASD-relevant variants**

| <b>ID</b>                              | <b>Variant</b>                      | <b>Diagnosis<br/>(age of dx)</b>                                                                   | <b>Phenotype Comments</b>                                                                                                                                                                                                                                                                                                                                                                                                                        | <b>Family Information (if any)</b>                                                                                                                               | <b>Management Implications</b>                                                                                                                                                                                                         |
|----------------------------------------|-------------------------------------|----------------------------------------------------------------------------------------------------|--------------------------------------------------------------------------------------------------------------------------------------------------------------------------------------------------------------------------------------------------------------------------------------------------------------------------------------------------------------------------------------------------------------------------------------------------|------------------------------------------------------------------------------------------------------------------------------------------------------------------|----------------------------------------------------------------------------------------------------------------------------------------------------------------------------------------------------------------------------------------|
| <b>Family A</b><br>2-1186-03<br>(male) | VIP<br>p.Tyr73*,<br>de novo         | <b>Clinical dx:</b><br>Asperger (3.2<br>yrs); <b>ADI &amp;<br/>ADOS dx:</b><br>Autism (3.2<br>yrs) | <b>IQ:</b> FSIQ Average 55%, VIQ<br>Above Average 84%, NVIQ<br>Average 37%, <b>Language:</b> TL<br>Average 68%, RL Average<br>55%, EL Above Average 77%,<br>RV: Average 61%; <b>Adaptive:</b><br>All Below Average, ABC 9%,<br>COM 23%, DLS 19%, SOC 6%,<br>MOT 10%; <b>Other:</b> Iron<br>deficient                                                                                                                                             | Mother (-01):<br>hypothyroidism, allergies<br><br>Sibling (-04, male):<br><b>Language:</b> RV Above Average<br>98%, trouble with bowels;<br>speech delay; clumsy | Possible deleterious ASD<br>mutation. Assessment of<br>male sibling <i>VIP</i> Y73*<br>mutation carrier for ASD.<br>Genetic counselling of<br>family, noting probable<br>gonadal mosaicism.<br>Prioritized for clinical<br>assessment. |
| <b>Family B</b><br>2-1305-03<br>(male) | CAPRIN1<br>p.Gln399<br>,<br>de novo | <b>Clinical dx:</b><br>Asperger<br>(6.2); <b>ADI &amp;<br/>ADOS dx:</b><br>Autism (7.1<br>yrs)     | <b>IQ:</b> All Above Average FSIQ<br>90%, VIQ=92%, NVIQ=97%;<br><b>Language:</b> TL Below Average<br>19%, RL Average 32%, EL<br>Below Average 14%, RV<br>Above Average 99%;<br><b>Adaptive:</b> ABC Below<br>Average 4%, COM Below<br>Average 21%, DLS Below<br>Average 5%, SOC Mild Delay<br>1%; <b>Other:</b> OCD suspected;<br>had fetal distress and had<br>trouble breathing, was<br>cyanotic and needed oxygen;<br>Gastrointestinal issues |                                                                                                                                                                  | Possible deleterious ASD<br>mutation. Detection of <i>de<br/>novo</i> mutation relevant<br>to genetic counselling.<br>Proband may be a<br>candidate for mGluR5<br>drug trial. Prioritized for<br>clinical assessment.                  |
| <b>Family C</b><br>2-1337-03           | SCN2A<br>p.440_45                   | <b>Clinical dx:</b><br>Autism (2.4                                                                 | <b>IQ:</b> NVIQ Mod Delay <0.1;<br><b>Adaptive:</b> ABC Mild Delay                                                                                                                                                                                                                                                                                                                                                                               | Mother (-01): seasonal<br>allergies, hypothyroidism                                                                                                              | Possible deleterious ASD<br>mutation. Detection of <i>de</i>                                                                                                                                                                           |

|                                        |                                             |                                                                                                 |                                                                                                                                                                                                                                                                                                                                          |                                                                                                                                                                                 |                                                                                                                                                                                       |
|----------------------------------------|---------------------------------------------|-------------------------------------------------------------------------------------------------|------------------------------------------------------------------------------------------------------------------------------------------------------------------------------------------------------------------------------------------------------------------------------------------------------------------------------------------|---------------------------------------------------------------------------------------------------------------------------------------------------------------------------------|---------------------------------------------------------------------------------------------------------------------------------------------------------------------------------------|
| (female)                               | 0 del,<br>de novo                           | yrs); <b>ADI &amp; ADOS dx:</b> Autism (4.0 yrs)                                                | 0.3%, COM: Mod Delay <0.1%, DLS Mild Delay 2%, SOC Mild Delay 1%, MOT Mild Delay 1%; <b>Other:</b> reactive asthma when sick                                                                                                                                                                                                             | Father (-02): suspected ADHD<br><br>Sibling (-04, female): <b>Clinical dx:</b> Atypical/PDD-NOS/ASD; <b>ADI &amp; ADOS dx:</b> ASD (7.9 yrs); See Supplemental data for details | <i>novo</i> mutation relevant to genetic counselling noting female ASD sibling does not have the mutation. Assess mutation carrier for epilepsy. Prioritized for clinical assessment. |
| <b>Family D</b><br>2-1370-03<br>(male) | USP54 .<br>p.Ser399<br>Glufs*10,<br>de novo | <b>Clinical dx:</b> Asperger (7.7 yrs); <b>ADI &amp; ADOS dx:</b> Autism (11.3 yrs)             | <b>IQ:</b> NVIQ Below Average 19%; <b>Language:</b> TL Average 55%, RL Average 53%, EL Average 61%, RV Above Average 94%; <b>Adaptive:</b> ABC Below Average 5% COM Average 30%, DLS Below Average 5%, SOC Mild Delay 1%; <b>Other:</b> allergies                                                                                        | Mother (-01): allergies                                                                                                                                                         | Candidate ASD mutation, which needs to be monitored in medical literature. Proband also carries three other predicted benign <i>de novo</i> mutations to follow.                      |
| <b>Family E</b><br>2-1303-03<br>(male) | KAL1<br>p.Arg423<br>*,<br>de novo           | <b>Clinical dx:</b> Atypical/PDD-NOS/ASD (3.8 yrs); <b>ADI &amp; ADOS dx:</b> Autism (14.4 yrs) | <b>IQ:</b> FSIQ Below Average 18%, VIQ Below Average 7%, NVIQ Average 39%; <b>Language:</b> All Below Average, RL 3%, EL 4%, TL 3%, RV 7%; <b>Adaptive:</b> ABC Mild Delay 1%, COM Mild Delay 2%, DLS Below Average 3%, SOC Mild Delay 0.4%, <b>Other:</b> Kallmann syndrome; one kidney; micro-penis; mirror movements; Type 1 diabetes | Mother (-01): underactive thyroid<br><br>Father (-02): high blood pressure                                                                                                      | Proband has Kallmann syndrome and ASD. Potential hormone treatment. Prioritized for clinical assessment.                                                                              |
| <b>Family F</b><br>2-1276-03           | MICALCL<br>p.Ser399<br>Leufs*10,            | <b>Clinical dx:</b> Atypical/PDD-NOS/ASD                                                        | <b>IQ:</b> NVIQ Severe Delay <0.1%; <b>Language:</b> RV Severe Delay <0.1%; <b>Adaptive:</b> ABC                                                                                                                                                                                                                                         | Mother (-01): seasonal allergies, asthma                                                                                                                                        | Candidate autosomal <i>MICALCL and DNMT3A</i>                                                                                                                                         |

|                                        |                                                                                                |                                                                                                 |                                                                                                                                                                                                                                                                                                                      |                                                                                                                                                                                                                                                                                                                              |                                                                                                                                                                                                                                                                                                                                 |
|----------------------------------------|------------------------------------------------------------------------------------------------|-------------------------------------------------------------------------------------------------|----------------------------------------------------------------------------------------------------------------------------------------------------------------------------------------------------------------------------------------------------------------------------------------------------------------------|------------------------------------------------------------------------------------------------------------------------------------------------------------------------------------------------------------------------------------------------------------------------------------------------------------------------------|---------------------------------------------------------------------------------------------------------------------------------------------------------------------------------------------------------------------------------------------------------------------------------------------------------------------------------|
| (female)                               | de novo;<br><br>DNMT3A<br>p.Arg635<br>Trp,<br><br>de novo                                      | (2.7 yrs); <b>ADI &amp; ADOS dx:</b> Autism (13.9 yrs)                                          | Severe Delay <0.1%, COM Mod Delay <0.1%, DLS Mod Delay <0.1%, SOC Mod Delay <0.1%, MOT Mild Delay 0.2%                                                                                                                                                                                                               | Father (-02): recovered from Hepatitis C<br><br>Extended family members with ASD                                                                                                                                                                                                                                             | ASD mutations, which need to be followed in the medical literature and in the context of 4 related family members also with ASD.                                                                                                                                                                                                |
| <b>Family G</b><br>2-1269-03<br>(male) | AFF2<br>p.ValV888<br>Ile,<br>(maternal<br>);<br><br>KCNQ2<br>c.1247+1<br>G>A<br><br>(paternal) | <b>Clinical dx:</b> Autism (3.3 yrs); <b>ADI &amp; ADOS dx:</b> Autism (3.9 yrs)                | <b>IQ:</b> NVIQ Above Average 87%; <b>Language:</b> TL Mild Delay 1%, RL Below Average 8%, EL Mild Delay 0.3%, RV: Below Average 12%; <b>Adaptive:</b> All Below Average, ABC 3%, COM 7%, DLS 5%, SOC 4%, MOT 3%; <b>Other:</b> at 3 days developed seizures; meningitis suspected, was on phenobarbital for 1 month | Mother (-01): asthma, hypertension, self-reported dyslexia<br><br>Father (-02): <b>Clinical dx:</b> Aspergers (40.0 yrs); <b>Language:</b> RV Average 25%; <b>Other:</b> depression, seizures as an infant<br><br>Sibling (-04, female): small head circumference<br><br>Extended paternal family members reported with ASD. | Possible deleterious ASD mutation in X-linked <i>AFF2</i> and autosomal <i>KCNQ2</i> mutation in known epilepsy gene.<br><br>Genetic counselling for nuclear and extended family, in particular for the female sibling mutation carrier. Proband may be a candidate for mGluR5 drug trial. Prioritized for clinical assessment. |
| <b>Family H</b><br>2-1353-03<br>(male) | ARHGEF6<br>p.Arg269I<br>le,<br>(maternal<br>);<br><br>ZC3H12B<br>p.Arg318                      | <b>Clinical dx:</b> Atypical/PDD -NOS/ASD (2.7 yrs); <b>ADI &amp; ADOS dx:</b> Autism (8.7 yrs) | <b>IQ:</b> NVIQ Below Average 2%; <b>Adaptive:</b> All Mild Delay ABC 1%, COM 1%, DLS 2%, SOC 0.3%                                                                                                                                                                                                                   | Mother (-01): allergies to bees and aspirin<br><br>Father (-02): allergies                                                                                                                                                                                                                                                   | Possible deleterious mutation in known <i>ARHGEF6</i> ASD gene. Follow medical literature for maternal X-linked <i>ZC3H12B</i> mutation. Prioritized for clinical assessment.                                                                                                                                                   |

|                                        |                                                                                       |                                                                                                                   |                                                                                                                                                                                                                                                                                    |                                                                            |                                                                                                                                                                                                                |
|----------------------------------------|---------------------------------------------------------------------------------------|-------------------------------------------------------------------------------------------------------------------|------------------------------------------------------------------------------------------------------------------------------------------------------------------------------------------------------------------------------------------------------------------------------------|----------------------------------------------------------------------------|----------------------------------------------------------------------------------------------------------------------------------------------------------------------------------------------------------------|
|                                        | Gln,<br>(maternal<br>)                                                                |                                                                                                                   |                                                                                                                                                                                                                                                                                    |                                                                            |                                                                                                                                                                                                                |
| <b>Family I</b><br>2-1330-03<br>(male) | DMD<br>p.Arg182<br>6Ile,<br>(maternal<br>);<br><br>WWC3<br>p.Arg940<br>Gln de<br>novo | <b>Clinical dx:</b><br>Asperger (3.7<br>yrs); <b>ADI &amp;<br/>ADOS dx:</b><br>Autism (11.2<br>yrs)               | <b>IQ:</b> All Average, FSIQ 32%,<br>VIQ 37%, NVIQ 32%;<br><b>Language:</b> TL Below Average<br>23%, RL Below Average 18%,<br>EL Average 34%, RV Average<br>27%; <b>Adaptive:</b> ABC Below<br>Average 21%, COM Average<br>39%, DLS Below Average<br>16%, SOC Below Average<br>23% | Father (-02): recovered from<br>brain tumour 3 years ago,<br>kidney stones | Proband to be assessed<br>for muscular dystrophy.<br>Genetic counselling of<br>family. Follow medical<br>literature for maternal X-<br>linked <i>WWC3</i> mutation.<br>Prioritized for clinical<br>assessment. |
| <b>Family J</b><br>2-1375-03<br>(male) | BCORL1<br>p.Arg109<br>0Pro,<br>(maternal<br>)                                         | <b>Clinical dx:</b><br>Atypical/PDD<br>-NOS/ASD<br>(4.8 yrs); <b>ADI<br/>&amp; ADOS dx:</b><br>Autism (10<br>yrs) | <b>IQ:</b> FSIQ Above Average 92%,<br>VIQ Above Average 95%,<br>NVIQ Below Average 79%;<br><b>Language:</b> TL Average 68%,<br>RL Above Average 77%, EL<br>Average 55%, RV Above<br>Average 90%; <b>Adaptive:</b> All<br>Below Average, ABC 6%,<br>COM 8%, DLS 19%, SOC 3%         |                                                                            | Genetic counselling of<br>family. Follow medical<br>literature for maternal X-<br>linked <i>BCORL1</i> mutation.                                                                                               |
| <b>Family K</b><br>2-1272-03<br>(male) | CHD7<br>p.Arg118<br>9His,<br>(paternal)                                               | <b>Clinical dx:</b><br>Asperger (5.9<br>yrs); <b>ADI &amp;<br/>ADOS dx:</b><br>Autism (6.4<br>yrs)                | <b>IQ:</b> FSIQ Above Average 81%;<br>VIQ Above Average 88%,<br>NVIQ Below Average 70%;<br><b>Language:</b> All Average, TL<br>58%, RL 58%, EL 61%, RV<br>50%; <b>Adaptive:</b> ABC Below<br>Average 19%, COM Average<br>50%, DLS Average 32%, SOC                                 | Mother (-01): lactose<br>intolerant                                        | Assess proband and<br>paternal mutation carrier<br>for CHARGE syndrome.<br>Prioritized for clinical<br>assessment.                                                                                             |

|                                        |                                                                                            |                                                                                    |                                                                                                                                                                                                                                                                                                                                                                                                         |                                                                                                                                                                                                                                                                                                                                                    |                                                                                                                                                                                                                                                                                                |
|----------------------------------------|--------------------------------------------------------------------------------------------|------------------------------------------------------------------------------------|---------------------------------------------------------------------------------------------------------------------------------------------------------------------------------------------------------------------------------------------------------------------------------------------------------------------------------------------------------------------------------------------------------|----------------------------------------------------------------------------------------------------------------------------------------------------------------------------------------------------------------------------------------------------------------------------------------------------------------------------------------------------|------------------------------------------------------------------------------------------------------------------------------------------------------------------------------------------------------------------------------------------------------------------------------------------------|
|                                        |                                                                                            |                                                                                    | Below Average 2%, MOT Average 34%; <b>Other:</b> recurrent ear infections, tonsils and adenoids removed, had sleep apnea; eats and sleeps well but no energy                                                                                                                                                                                                                                            |                                                                                                                                                                                                                                                                                                                                                    |                                                                                                                                                                                                                                                                                                |
| <b>Family L</b><br>2-1291-03<br>(male) | SCN2A<br>p.Arg28C<br>ys,<br>(maternal<br>)<br><br>KIAA0284<br>p.Arg112<br>2His, de<br>novo | <b>Clinical dx:</b> Asperger (6.4 yrs); <b>ADI &amp; ADOS dx:</b> Autism (8.1 yrs) | <b>IQ:</b> All average, FSIQ 32%, VIQ 45%, NVIQ 68%; <b>Language:</b> TL Below Average 21%, RL Below Average 19%, EL Average 30%, RV Above Average 77%; <b>Adaptive:</b> All Below Average, ABC 4%, COM 8%, DLS 7%, SOC 2%; <b>Other:</b> Anxiety and OCD; idiopathic ventricular tachycardia in infancy; learning disability – hard time reading; low muscle tone; developmental coordination disorder | Mother (-01): procrastinate, worrier<br><br>Father (-02): arthritis – from early teens and is quite severely affected; dyslexia<br><br>Sibling (-04, female): poor at reading social cues, relates better to adults, concerns expressed about ASD<br><br>Sibling (-05, female): heart murmur, but outgrew it; procrastinator, time management hard | Candidate deleterious <i>SCN2A</i> ASD mutation in male proband and two female sibling carriers. Genotype and phenotype (including gender) study (see Discussion). Assess mutation carriers for epilepsy. Follow medical literature for <i>KIAA0284</i> . Prioritized for clinical assessment. |
| <b>Family M</b><br>2-1116-03<br>(male) | NRXN1<br>p.His885T<br>yr,<br>(paternal)<br>;<br><br>ARID5A                                 | <b>Clinical dx:</b> Autism (4.8 yrs); <b>ADI &amp; ADOS dx:</b> Autism (8.6 yrs)   | <b>IQ:</b> NVIQ Below Average 23%; <b>Language:</b> All Mild Delay, TL 0.2%, RL 0.5%, EL 0.3%; <b>Adaptive:</b> All Mild Delay, ABC 1%, COM 1%, DLS 1%, SOC 0.5%; <b>Other:</b> eczema; one incident of no body hair                                                                                                                                                                                    | Mother (-01): allergies, eczema, alopecia<br><br>Sibling (-04, male): eczema; infant asthma, learning disability- Central Auditory Processing Disorder (CAPD)                                                                                                                                                                                      | Candidate damaging inherited mutation in known ASD candidate <i>NRXN1</i> and ASD candidate <i>ARID5A</i> . Assess female sibling <i>NRXN1</i> mutation carrier for ASD. Prioritized for clinical                                                                                              |



|                                        |                                                                                            |                                                                                                 |                                                                                                                                                                                                                                                                    |                                                                                                                     |                                                                                                                                                                       |
|----------------------------------------|--------------------------------------------------------------------------------------------|-------------------------------------------------------------------------------------------------|--------------------------------------------------------------------------------------------------------------------------------------------------------------------------------------------------------------------------------------------------------------------|---------------------------------------------------------------------------------------------------------------------|-----------------------------------------------------------------------------------------------------------------------------------------------------------------------|
|                                        | p.Gly120 Val, de novo                                                                      |                                                                                                 |                                                                                                                                                                                                                                                                    |                                                                                                                     | assessment.                                                                                                                                                           |
| <b>Family N</b><br>2-1244-03<br>(male) | CACNA1C<br>p.Arg152<br>2Gln,<br>(paternal)                                                 | <b>Clinical dx:</b> Atypical/PDD -NOS/ASD (4.7 yrs); <b>ADI &amp; ADOS dx:</b> Autism (8.9 yrs) | <b>IQ:</b> All Average, FSIQ 53%, VIQ 55%, NVIQ 68%; <b>Language:</b> TL Below Average 7%, RL Mild Delay 1%, EL Average 32%, RV Above Average 81%; <b>Adaptive:</b> All Average, ABC 30%, COM 21%, DLS 58%, SOC 27%; <b>Other:</b> ADHD, migraines, peanut allergy | Mother (-01): epilepsy<br><br>Father (-02): Wolff Parkinson-White syndrome<br><br>Sibling (-04, male): milk allergy | Candidate damaging mutation in known ASD gene <i>CACNA1C</i> . Assess paternal and male sibling mutation carriers for ASD. Prioritized for clinical assessment.       |
| <b>Family O</b><br>2-1352-03<br>(male) | EHMT1<br>p.Pro109<br>9Ala,<br>(maternal );<br><br>NLGN3<br>p.Val306<br>Met,<br>(maternal ) | <b>Clinical dx:</b> Asperger (4.6); <b>ADI &amp; ADOS dx:</b> Autism (7.3 yrs)                  | <b>IQ:</b> All Above Average, FSIQ 90%, VIQ 90%, NVIQ 82%; <b>Language:</b> All average, TL 53%, RL 42%, EL 63%, RV 63%; <b>Adaptive:</b> TL Average 25%, COM Average 61%, DLS Average 42%, SOC Below Average 5%                                                   | Mother (-01): allergy-induced asthma<br><br>Father (-02): mitrovalve prolapse                                       | Candidate damaging mutation in ASD candidate gene <i>EHMT1</i> . Rare predicted benign mutation in known ASD gene <i>NLGN3</i> . Prioritized for clinical assessment. |
| <b>Family P</b><br>2-1334-03<br>(male) | SATB2<br>p.Pro655S<br>er, rare<br>inherited                                                | <b>Clinical dx:</b> Autism (3.3 yrs); <b>ADI &amp; ADOS dx:</b> Autism (4.9                     | <b>IQ:</b> NVIQ Mild Delay 1%; <b>Language:</b> RV Mild Delay 0.4%; <b>Adaptive:</b> All Mild Delay, ABC 0.3%, COM 0.5%,                                                                                                                                           |                                                                                                                     | Candidate damaging mutation in known ASD gene <i>SATB2</i> . Assess paternal carrier for ASD. Prioritized for clinical                                                |

|  |            |      |                          |  |             |
|--|------------|------|--------------------------|--|-------------|
|  | (paternal) | yrs) | DLS 1%, SOC 1%, MOT 0.5% |  | assessment. |
|--|------------|------|--------------------------|--|-------------|

Test scores are presented in percentiles (%) using the following classifications: Above Average (75<sup>th</sup>-99<sup>th</sup> %), Average (74<sup>th</sup>-25<sup>th</sup> %), Below Average (24<sup>th</sup>-2<sup>nd</sup> %), Mild Delay (2<sup>nd</sup>-0.1<sup>st</sup>%) Moderate Delay (0.1%) and Severe Delay (<0.1%).

Intelligence (IQ) was measured with an age-appropriate Wechsler Scale (Wechsler Preschool and Primary Scale of Intelligence, WPPSI-III; Wechsler Intelligence Scale for Children, WISC-IV; Wechsler Abbreviated Scale of Intelligence, WASI) or Leiter-R Brief (Leiter-R only measures nonverbal IQ). Score are presented in percentiles for Full Scale IQ (FSIQ), Verbal IQ (VIQ), Nonverbal IQ (NVIQ).

Language was measured with the Oral and Written Language Scales (OWLS) and percentile scores are presented for Total Language (TL), Receptive Language (RL), Expressive Language (EL). Receptive Vocabulary (RV) was assessed using the Peabody Picture Vocabulary Test (PPVT-4th Edition).

Adaptive Behaviour was measured using the Vineland Adaptive Behaviour Scales- Second Edition (VABS-II) and percentiles are presented for Adaptive Behaviour Composite (ABC), Communication (COM), Daily Living Skills (DLS), Socialization (SOC), and Motor (MOT; only for children under 7 years).

Other abbreviations: ASD: autism spectrum disorder, ADHD: attention deficit hyperactivity disorder, ADI: autism diagnostic interview, ADOS: autism diagnostic observation schedule

All female X-linked variant carriers were tested for X-inactivation skewing. In family G (2-1269), maternal grandmother has skewed X-inactivation (>70% variant allele inactivated), while mother is not informative for the X-inactivation test. In family I (2-1330), both mother and maternal grandmother have skewed X-inactivation (>70% and >90% respectively, but their genotypes were not informative to determine the direction of skewing).
